# 1 Function and regulation of chloroplast 2 peroxiredoxin IIE

3 Anna Dreyer<sup>1§</sup>, Patrick Treffon<sup>1§§</sup>, Daniel Basiry<sup>1</sup>, Anna Maria Jozefowicz<sup>2</sup>, Andrea Matros<sup>2‡</sup>,  
4 Hans-Peter Mock<sup>2</sup>, Karl-Josef Dietz<sup>1\*</sup>

5 <sup>1</sup> Department of Biochemistry and Physiology of Plants, Faculty of Biology, University of Bielefeld, 33615  
6 Bielefeld, Germany; ptreffon@umass.edu (PT); anna.dreyer@uni-bielefeld.de (AD); danielbasiry@gmx.de  
7 (DB)

8 <sup>2</sup> Applied Biochemistry Group, Leibniz Institute for Plant Genetics and Crop Plant Research (IPK), 06466  
9 Seeland, OT Gatersleben, Germany; jozefowicz@ipk-gatersleben.de (AMJ); andrea.matros@icloud.com  
10 (AM); mock@ipk-gatersleben.de (HPM)

11  
12 <sup>§</sup> shared first authorship due to equal contribution to this research

13 <sup>§§</sup> current affiliation PT: Department of Biochemistry and Molecular Biology, University of Massachusetts  
14 Amherst, USA

15 <sup>‡</sup> current affiliation AM: Australian Research Council Centre of Excellence in Plant Cell Walls, University of  
16 Adelaide, SA 5064 Adelaide, Australia

17 <sup>\*</sup> Correspondence: karl-josef.dietz@uni-bielefeld.de; Tel. +49-521-106-5589 (KJD)

18 Received: date; Accepted: date; Published: date

19 **Abstract:** Peroxiredoxins (PRX) are thiol peroxidases which are highly conserved throughout all  
20 biological kingdoms. Increasing evidence suggests that their high reactivity toward peroxides has a  
21 function not only in antioxidant defense but in particular in redox regulation of the cell.  
22 Peroxiredoxin IIE is one of three PRX types found in plastids and has previously been linked to  
23 pathogen defense and protection from protein nitration. However, its posttranslational regulation  
24 and its function in the chloroplast protein network remained to be explored. Using recombinant  
25 protein, it was shown that the peroxidatic Cys121 is subjected to multiple posttranslational  
26 modifications, namely disulfide formation, S-nitrosation, S-glutathionylation and hyperoxidation.  
27 Slightly oxidized glutathione fostered S-glutathionylation and inhibited activity *in vitro*.  
28 Immobilized recombinant PRX-IIE allowed trapping and subsequent identification of interaction  
29 partners by mass spectrometry. Interaction with the 14-3-3  $\nu$  protein was confirmed *in vitro* and was  
30 shown to be stimulated under oxidizing conditions. Interactions did not depend on  
31 phosphorylation as revealed by testing phospho-mimicry variants of PRX-IIE. Based on these data  
32 it is proposed that 14-3-3 $\nu$  guides PRX-IIE to certain target proteins, possibly for redox regulation.  
33 These findings together with the other identified potential interaction partners of type II PRXs  
34 localized to plastids, mitochondria and cytosol provide a new perspective on the redox regulatory  
35 network of the cell.

36 **Keywords:** Peroxiredoxin, AT3G52960, glutathione, S-glutathionylation, glutaredoxin, 14-3-3  
37 protein, phosphorylation, posttranslational modification, redox regulatory network  
38

---

## 39 1. Introduction

40 Chloroplasts of cormophytes contain three types of peroxiredoxins (PRXs), namely classical 2-  
41 cysteine peroxiredoxin (2-CysPRX), a bacteroferritin-comigratory protein homologue PRX-Q and a  
42 type II peroxiredoxin named PRX-IIE [1,2]. The basic PRX complement of plastids is subjected to  
43 variation by the presence of isoforms, e.g., 2-CysPRX-A and -B in *Arabidopsis thaliana* (At3g11630,  
44 At5g06290), and PRX-IIE-1 and PRX-IIE-2 in *Oryza sativa* (Os06g42000, Os02g09940) [3].

45 PRXs are thiol peroxidases. They possess a peroxidatic cysteinyl thiol (Cys<sub>P</sub>) with a very low pK  
46 value, and thus expose the deprotonated thiolate anion in a conserved catalytic environment. Because  
47 of this particular feature, PRXs function as highly affine and efficient thiol peroxidases [4]. The  
48 catalytic activity of 2-CysPRX, PRX-Q and type II PRX relies on a conserved second cysteine, which

49 acts as resolving thiol (Cys<sub>R</sub>). Upon reaction with the peroxide substrate, the Cys<sub>P</sub>-thiol forms a  
50 sulfenic acid derivative which immediately is attacked by the Cys<sub>R</sub>. A disulfide bond is formed  
51 between Cys<sub>P</sub> and Cys<sub>R</sub>. Prior to the next catalytic cycle, the disulfide bond needs to be reduced to  
52 dithiols by electron donors like thioredoxin (TRX) or glutathione/glutaredoxin (GRX). The different  
53 PRX forms show variation in their primary sequence, as well as the presence and position of Cys<sub>R</sub>  
54 and the regeneration mechanism [2].

55 The best understood plant PRX is the 2-CysPRX, which has been scrutinized with respect to its  
56 catalytic properties, redox-dependent conformational dynamics, regeneration by electron  
57 transmitters such as TRX and GRX/GSH and its role in the redox regulatory network of the  
58 chloroplast [5–8]. In contrast PRX-Q and PRX-IIIE have been studied for their peroxidatic property,  
59 regeneration mechanism and their function in mutant plants with decreased protein amounts [9,10].  
60 PRX-IIIE belongs to the group of highly conserved atypical 2-cysteine peroxiredoxins, initially  
61 discovered in the phloem of *poplar* [11]. PRX-II type PRX are found in, e.g., some but not all  
62 photosynthetic cyanobacteria [12], animals/humans (PRDX5) [13] and lower and higher plants [14].

63 Previous studies showed PRXIIIE to be localized in the soluble fraction of plastids. Its transcript  
64 amount in *A. thaliana* leaves slightly increased in response to high light, decreased upon ascorbate  
65 and NaCl treatment and remained unchanged with leaf age [1,15]. The redox titration of the dithiol-  
66 disulfide transition gave a midpoint redox potential of -288 mV which is 19 and 34 mV, respectively,  
67 less negative than 2-CysPRX-A and -B [1].

68 Re-reduction of the oxidized PRX-IIIE from *poplar* was most efficient with GRX/glutathione  
69 system, and low with glutathione and TRX [14]. The catalytic efficiency was 10<sup>5</sup> M<sup>-1</sup>s<sup>-1</sup> with tertiary  
70 butylhydroperoxide (t-BOOH), fourfold less with H<sub>2</sub>O<sub>2</sub>, and activity was absent with cumene  
71 hydroperoxide (CuOOH) [14]. Among the three GRXs (GRX-S12, -S14 and -S16) targeted to the  
72 plastid in *poplar*, GRX-S12 efficiently regenerated oxidized PRX-IIIE [14]. The authors suggested a  
73 catalytic mechanism where the sulfenic acid derivative, formed by reaction with the peroxide  
74 substrate, reacts with reduced glutathione to form a S-glutathionylated intermediate. GRX reduces  
75 the Cys<sub>P</sub>-SG and become itself S-glutathionylated. Another glutathione molecule then regenerates  
76 GRX-SG, leading to the formation of oxidized glutathione(GSSG)[14,16].

77 This study aimed for the biochemical characterization of PRX-IIIE, with focus on redox-  
78 dependent posttranslational modifications of its critical cysteine residues and their impact on protein  
79 function. In the light of the presumed function in redox signaling, it appeared timely to address the  
80 interactome of PRX-IIIE by affinity chromatography and mass-spectrometric identification. The  
81 interaction with 14-3-3 *ν* was further validated and shown to slightly affect the peroxidase activity.  
82 These novel findings point out to an additional role in redox signaling apart from its peroxidase  
83 activity.

## 84 2. Materials and Methods

### 85 2.1. Plant material and growth conditions

86 *A. thaliana* Col-0 plants were grown on soil (SM Max Planck Köln, project 187509, Stender,  
87 Germany) in a greenhouse with 14 h day and 10 h night at 25°C.

### 88 2.2. Cloning

89 PRX-IIIE (AT3G52960), GRX-S12 (AT2G20270) and sulfiredoxin (SRX; AT1G31170) were cloned  
90 into pET28a (Novagen, Darmstadt, Germany). Forward and reverse primer were designed with *Nde*I  
91 and *Bam*HI restriction sites, respectively (Table S1). The variants C121S, C146S, C121S/C146S, S82D,  
92 T108E and T223E of PRX-IIIE were generated by site-directed mutagenesis with specific primers  
93 (Table S1). Correctness of all constructs was confirmed by DNA sequencing.

### 94 2.3. Heterologous expression and purification

95 *E. coli* BL21 (DE3)pLysS cells (Invitrogen, La Jolla, CA, USA) were transformed with plasmid  
96 DNA. Overnight cultures were used to inoculate 2 L lysogeny broth medium supplemented with

97 50 µg/mL kanamycin and 20 µg/mL chloramphenicol. Protein expression was induced in the  
98 exponential phase by addition of isopropyl-β-D-thiogalactopyranoside to a final concentration of  
99 0.4 mM. Induced cells were grown at 37°C and 140 rpm for 4 h. Cells were harvested for 15 min at  
100 5,000  $xg$  and resuspended in lysis buffer (50 mM NaH<sub>2</sub>PO<sub>4</sub>, 300 mM NaCl and 10 mM imidazole,  
101 pH 8.0). Cells were disrupted using lysozyme digestion followed by sonication (HF-Generator  
102 GM2070 in combination with an ultrasonic converter UW2070, standard horn SH 70G and microtip  
103 MS73, Bandelin, Berlin, Germany). The soluble and insoluble fractions were separated by  
104 centrifugation at 20,000  $xg$  for 45 min. His-tagged proteins were incubated with Nickel-nitrilotriacetic  
105 acid (NTA) sepharose (Qiagen, Hilden, Germany) at 4°C with slight shaking for 1 h. Washing was  
106 performed with washing buffer I (50 mM NaH<sub>2</sub>PO<sub>4</sub>, 300 mM NaCl and 20 mM imidazole, pH 8.0)  
107 and subsequently washing buffer 2 (50 mM NaH<sub>2</sub>PO<sub>4</sub>, 300 mM NaCl, 20 (v/v) glycerol and 50 mM  
108 imidazole, pH 8.0) until the OD<sub>280</sub> reached zero. Elution was achieved with elution buffer (50 mM  
109 NaH<sub>2</sub>PO<sub>4</sub>, 300 mM NaCl and 250 mM imidazole, pH 8.0). Protein containing fractions were pooled  
110 and dialyzed against 40 mM K-Pi pH 7.2. After dialysis, protein concentrations were determined  
111 using a molar extinction coefficient of 8480 M<sup>-1</sup> cm<sup>-1</sup> for PRX-IIIE and its variants and 9970 M<sup>-1</sup>·cm<sup>-1</sup>  
112 and 4470 M<sup>-1</sup>·cm<sup>-1</sup> for GrxS12 and Srx, respectively. GrxC5 (At4g28730) was purified following  
113 established procedures [17,18].

#### 114 2.4. Xylenol orange assay

115 The ferrous-dependent xylenol orange assay (FOX) was used to analyze the activity of PRX-IIIE  
116 and its phosphomimic variants with DTT as electron donor. The reaction mixture contained 2 µM  
117 PRX-IIIE and 4 mM dithiothreitol (DTT) in 40 mM K-Pi pH 7.2. The measurement was started by  
118 addition of peroxides (400 µM H<sub>2</sub>O<sub>2</sub>, 200 µM t-BOOH or 200 µM CuOOH) in a time course of 90 sec  
119 at 15 s intervals. The remaining peroxides were detected by ferrous-dependent oxidation of xylenol  
120 orange as reported previously [19].

#### 121 2.5. NADPH-dependent peroxidase activity measurement

122 Reduction of peroxides by PRX-IIIE was monitored with the GRX system as reductant. The  
123 activity was measured using a Cary 300 Bio UV/VIS spectrometer (Varian, Middelburg, Netherlands)  
124 following NADPH oxidation at 340 nm. The assay was performed at 25 °C in quartz cuvettes with  
125 2 µM PRX-IIIE, 0.5 units glutathione reductase (GR), 200 µM NADPH, 1 mM EDTA, 1 mM GSH,  
126 varying amounts of GrxS12 and of peroxides (H<sub>2</sub>O<sub>2</sub>, t-BOOH, CuOOH) in 40 mM K-Pi, pH 7.2.

#### 127 2.6. Hyperoxidation of PRX-IIIE

128 Hyperoxidation of PRX-IIIE was assayed as described above using the FOX assay with 400 µM  
129 H<sub>2</sub>O<sub>2</sub> as substrate and increasing CuOOH concentrations. Furthermore, the oxidation state was  
130 investigated by electrospray ionization coupled with mass spectrometry (ESI-MS; Esquire 3000,  
131 Bruker Daltonics, Bremen, Germany). 10-20 µM of prereduced protein in 100 mM Tris-HCl, pH 8.0,  
132 was incubated with 5 mM DTT and different CuOOH and 0.5 mM DTT and increasing H<sub>2</sub>O<sub>2</sub>  
133 concentrations for 1 h at room temperature (RT). Excess low molecular weight reagents were  
134 removed by acetone precipitation and proteins were resuspended in H<sub>2</sub>O. Dilutions were prepared  
135 in 30 % EtOH, 0.1 % formaldehyde (FA) and the mixture was introduced into the ESI-MS.  
136 Instrumental settings: Capillary voltage = 4.000 V. Nebulizer gas pressure = 15 psi. Drying gas flow =  
137 4.0 L/min. Drying gas temperature = 300 °C. Mass-to-charge (m/z) values: 650-1200. Mass spectra  
138 were deconvoluted using the software provided by the manufacturer (DataAnalysis, Bruker  
139 Daltonics, Bremen, Germany).

#### 140 2.7. S-glutathionylation

141 10 – 30 µM PRX-IIIE in 100 mM Tris-HCl, pH 8, was reduced for 30 min at room temperature  
142 (RT) with 4 mM DTT. Desalting was achieved by passing the solution through PD10 columns. S-  
143 glutathionylation was carried out by disulfide exchange with oxidized glutathione (GSSG) for 1 h at

144 RT. Excess GSSG was removed via acetone precipitation. Afterwards, S-glutathionylation was  
145 detected by Western blot using monoclonal anti-GSH antibody (Thermo Scientific, Schwerte,  
146 Germany). In addition, molecular masses of modified and unmodified proteins were assessed by ESI-  
147 MS as mentioned before. For deglutathionylation, 10  $\mu$ M glutathionylated PRX-IIIE was incubated  
148 with 10  $\mu$ M of GrxS12, GrxC5 or SRX and 0.5 mM GSH at 25 °C. The decrease of glutathionylated  
149 PRX-IIIE was determined using Western Blot with anti-GSH antibodies. The spot intensities were  
150 analysed using ImageJ.

## 151 2.8. 2-Dimensional SDS-PAGE

152 6-week-old *A. thaliana* Col\_0 plants were sprayed with 300  $\mu$ M methylviologen (MV) and 0.1%  
153 (v/v) Tween-20 as control, respectively. After 3 h the plants were harvested and immediately frozen  
154 in liquid nitrogen and grinded. Proteins were isolated and used for the separation in the first  
155 dimension with Immobiline Dry Stripes (pH range 3-10 NL, 18 cm, GE Healthcare, Uppsala, Sweden)  
156 [20]. To this end 250  $\mu$ g protein were dissolved in 340  $\mu$ L rehydration buffer (0.01% ampholyte;  
157 0002 % (w/v) bromophenolblue) and applied to the Immobiline Dry Stripe. The rehydration and  
158 focusing consisted of the following steps: 1 h 0 V, 12 h 30 V, 2 h 60 V, 1 h 500 V, 1 h 1000 V and 8000 V  
159 until 42000 Vh were reached. Separation in the second dimension was done with 12 % non-reductive  
160 SDS-PAGE. Afterwards, the gel was blotted to nitrocellulose membrane and subjected to Western  
161 blotting with PRX-IIIE antibody. and peroxidase-labeled secondary antibodies. Detection was done  
162 with ECL Substrate (GE Healthcare, Chicago, IL, USA) and X-ray films.

## 163 2.9. Subcellular localisation of PRX-IIIE

164 The open reading frame of PRX-IIIE from *A. thaliana* was cloned into the 35S-EYFP-NosT vector  
165 using specific primers (Table S1) for *in vivo* subcellular localization of PRX-IIIE [21]. The resulting  
166 construct consists of the PRX-IIIE preprotein fused to EYFP as reporter under control of the CaMV35S-  
167 promoter. Transient expression in mesophyll protoplasts and confocal laser scanning microscopy  
168 were performed as described by Seidel et al. [22]. Chloroplast isolation and fractionation for  
169 subplastidial Western blot analysis with antibodies raised against PRX-IIIE were carried out according  
170 to Muthuramalingam et al. [23].

## 171 2.10. Affinity chromatography and mass spectrometry

172 Reduced His-tagged PRX-IIIE (3 mg) or PRX-IIIE C146S (3 mg) were bound to 1 mL Ni-NTA resin  
173 (Qiagen, Hilden, Germany) and used as affinity matrix. Ni-NTA matrix without PRX-IIIE served as  
174 control. Leaves of about 5-week-old plants were homogenized in 50 mM Tris-HCl, pH 8.0, 1 mM  
175 PMSF, filtrated through Miracloth. Clear protein extract was obtained via centrifugation (30 min at  
176 20.000 rpm and 4°C). The supernatant (about 40 mg protein) was applied to the matrix and incubated  
177 at RT with gentle agitation for 1.5 h. Non-bound material was removed by washing the column with  
178 20 mL of 50 mM Tris-HCl, pH 8.0, and 20 mL of 50 mM Tris-HCl, pH 8.0, 200 mM NaCl. The first  
179 elution step was achieved with 1 ml of 50 mM Tris-HCl, pH 8.0, 200 mM NaCl, 50 mM DTT and  
180 incubation for 15 min at RT. The eluted fraction was collected and stored. Afterwards the columns  
181 were washed with 10 mL 50 mM Tris-HCl, pH 8.0, 200 mM NaCl. During the second elution step the  
182 material was incubated for 15 min at RT in 1 mL 50 mM Tris-HCl, pH 8.0, 200 mM NaCl, 50 mM DTT  
183 and 500 mM imidazole. The samples of the first and second elution were trypsinated after  
184 chloroform/methanol precipitation [24] and dissolved in 0.1 % TCA, 1 % acetonitrile. Peptides were  
185 separated by reverse-phase nano LC and analyzed by electrospray ionization-mass spectrometry  
186 (ESI-QTOF-MS) as described elsewhere [25]. Data were searched against the entries of UP000006548  
187 3702 ARATH *A. thaliana* of the UniProt database using ProteinLynx Global Server 3.0.2. Proteins,  
188 which were found in two out of three biological experiments with at least two peptides were accepted  
189 for further analysis. In addition, proteins, which were identified in control sample (nonspecific  
190 binding), were removed from protein lists. The LC-MS data are deposited using the e!DAL system of  
191 IPK Gatersleben [26] and available at: the submission is under progress and will be available soon.

192 2.11. Far Western blot

193 Dilution series of recombinant 14-3-3 v protein were spotted on nitrocellulose membrane,  
 194 together with a dilution series of PRX-IIE as calibration curve. The membrane was blocked with Tris-  
 195 buffered saline (TBS), pH 7.5, containing 1 % (w/v) milk powder. The membrane was incubated with  
 196 PRX-IIE or its phospho-mimicry variants in TBS with either 1 mM DTT or 100  $\mu$ M H<sub>2</sub>O<sub>2</sub> over night at  
 197 4°C. After three times washing with TBS for 5 min, proteins were detected using specific anti-PRX-  
 198 IIE antibody, peroxidase-labeled secondary antibody against rabbit, ECL<sup>®</sup> substrate (GE Healthcare,  
 199 Chicago, IL, USA) and X-ray films. Intensity quantification of the spots after documentation was done  
 200 using ImageJ. The relative amounts of bound PRX-IIE were determined in the linear range of the  
 201 blots.

202 2.12. Structural modeling

203 PRX-IIE structure was obtained from SWISS-MODEL [27] based on the structure of *Populus*  
 204 *tremula* PRX D type II (pdb: 1tp9A). Further analysis was done with PyMOL version 2.4.0 [28].

205 3. Results

206 3.1. PRX-IIE is localized to the chloroplast stroma

207 The PRX family in *A. thaliana* consists of 10 ORFs, of which 9 members are described to be  
 208 expressed [29]. Besides the mitochondrial PRX-IIF, RRX-IIE is the only type II PRX in Arabidopsis  
 209 which displays a putative transit peptide. Bioinformatic analysis of the preprotein sequence predicted  
 210 an N-terminal chloroplastic transit peptide for the first 70 amino acids (Figure 1A). The remaining  
 211 amino acids form the stable TRX-like structure with seven  $\beta$ -sheets and five  $\alpha$ -helices (Figure 1B). To  
 212 study the subcellular localization of PRX-IIE, a plasmid encoding the PRX-IIE-EYFP fusion protein  
 213 was transfected into mesophyll protoplasts. Confocal laser scanning microscopy of the transfected  
 214 protoplasts revealed the plastidial localization, as indicated in the overlay of the EYFP signal with  
 215 the chlorophyll autofluorescence (Figure 1C). Western blot analysis of fractionated chloroplasts with  
 216 anti-PRX-IIE antibody revealed a signal exclusively in the stromal fraction, whereas the  
 217 thylakoid/membrane fraction lacked any PRX-IIE signal (Figure 1D).

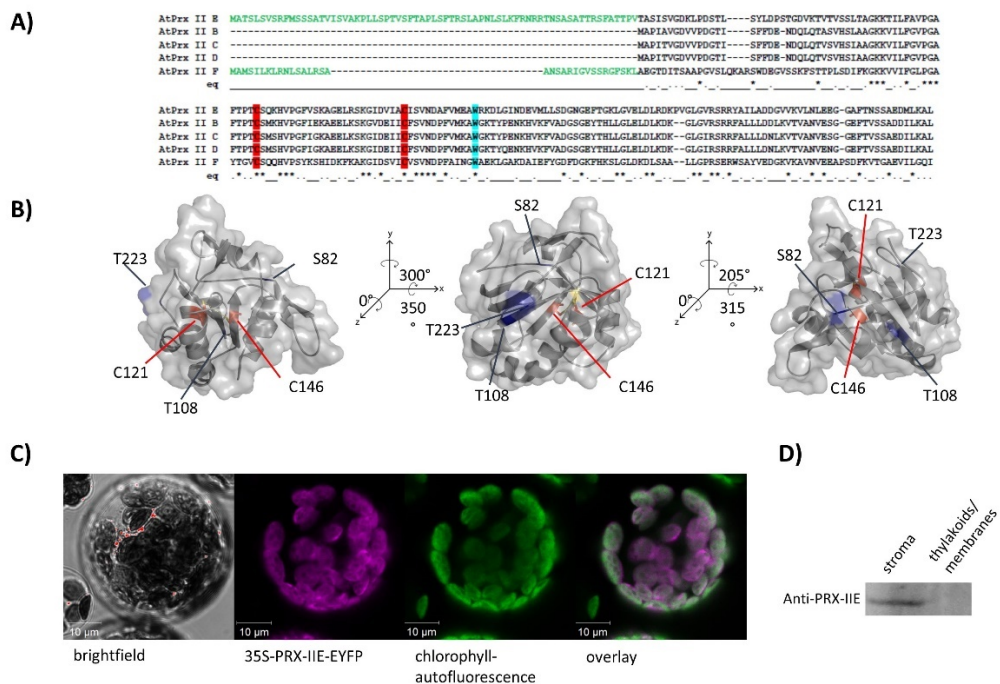

219

220

221

**Figure 1 Subcellular localization of PRX-IIE.** A) Amino acid sequence alignment of *A. thaliana* type II PRXs. The signal peptides of PRX-IIE and PRX-IIF are highlighted in green as well as the highly

222 conserved cysteines (C: red) and tryptophan (W: blue). B) Predicted 3D structure of mature PRX-IIIE  
 223 from three different points of view. The model is based on the PRX D type II from *P. tremula*  
 224 (pdb:1tp9A) and further analysis was done using PyMOL 2.4. Both cysteines, C121 and C146 are  
 225 marked in red, whereas the possible phosphorylation sites S82, T108 and T223 are marked in blue.  
 226 The distance between the cysteines are 7.83 Å. The accessible surface area of the peroxidatic cysteine  
 227 at position 121 is 0.795 Å<sup>2</sup>. C) The coding sequence of PRX-IIIE was fused in frame to EYFP as reporter  
 228 and used for transient expression in *A. thaliana* mesophyll protoplasts. Confocal laser scanning images  
 229 reveal chlorophyll autofluorescence (green) and fluorescence of the PRX-IIIE-EYFP construct (purple).  
 230 White areas in the overlay indicate chloroplastic localization of PRX-IIIE. D) Subplastidal localization  
 231 of PRX-IIIE was analyzed in isolated intact chloroplasts fractionated into stroma and membrane  
 232 fraction by ultracentrifugation. Equal amounts of both fractions (50 µg protein) were loaded per lane  
 233 and PRX-IIIE was identified in chloroplast stroma using specific anti PRX-IIIE antibody.

### 234 3.2. PRXIIIE detoxifies H<sub>2</sub>O<sub>2</sub> using the GRX system for regeneration

235 Peroxiredoxins reduce a broad range of peroxides and their activities rely on the conserved  
 236 cysteine residues. Reduction of H<sub>2</sub>O<sub>2</sub> by PRX-IIIE and its cysteine variants was determined using the  
 237 FOX assay. The removal of either the Cys<sub>P</sub> as well as the Cys<sub>R</sub> residue has a negative impact on  
 238 peroxidase activity, constraining that both thiol groups are necessary for reactive oxygen species  
 239 (ROS) scavenging (Figure 2A). Substrate specificity with H<sub>2</sub>O<sub>2</sub>, t-BOOH and CuOOH of wild-type  
 240 (WT) protein is depicted in Figure 2B. PRX-IIIE showed the highest rate of activity with H<sub>2</sub>O<sub>2</sub> as  
 241 substrate and DTT as reductant. Reduction rates of t-BOOH and CuOOH relative to H<sub>2</sub>O<sub>2</sub> were about  
 242 20 % and 0.5 %, respectively. This indicates that H<sub>2</sub>O<sub>2</sub> is the preferred substrate for PRX-IIIE.  
 243 Furthermore, peroxide reduction by PRX-IIIE in the presence of chloroplastic glutaredoxin-S12 (GRX-  
 244 S12) as reductant was determined (Figure 2C) and confirmed H<sub>2</sub>O<sub>2</sub> as preferred substrate, but unlike  
 245 with DTT, lower activities were recorded.  
 246

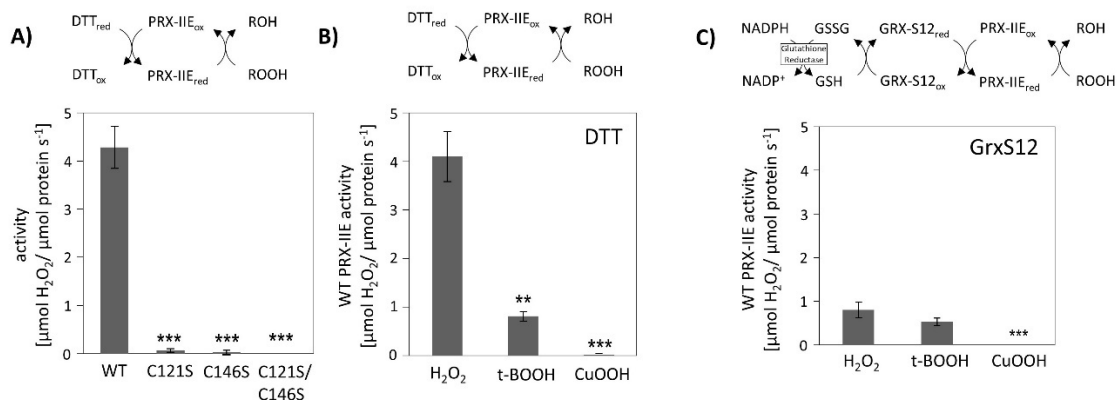

247  
 248 **Figure 2 Peroxidase activity.** A) Peroxide reduction by wild-type PRX-IIIE and its cysteine variants  
 249 was measured with 400 µM H<sub>2</sub>O<sub>2</sub>, 4 mM DTT and 2 µM protein. The decrease in H<sub>2</sub>O<sub>2</sub> was quantified  
 250 with the FOX assay. Data are means ± SD, n = 30 with protein of three independent protein  
 251 purifications. \*\*\*: p < 0.001. B) Substrate specificity was tested with the FOX assay with 4 mM DTT as  
 252 reductant and different peroxides (400 µM H<sub>2</sub>O<sub>2</sub>, 200 µM t-BOOH or 200 µM CuOOH). Data are  
 253 means ± SD, n = 18-28 with protein from three independent protein purifications. \*\*: p < 0.01; \*\*\*: p <  
 254 0.001. C) PRX-IIIE activity in the presence of GRX-S12 as monitored as NADPH oxidation at 340 nm  
 255 in an enzyme-coupled reduction. Data are means ± SD, n = 9 with protein from three independent  
 256 protein purifications. \*\*: p < 0.01; \*\*\*: p < 0.001.

### 257 3.3. CuOOH- and H<sub>2</sub>O<sub>2</sub>-dependent hyperoxidation

258 CuOOH is a strong oxidizing agent and based on activity measurements (Figure 2B) it was  
 259 assumed that PRX-IIIE is hyperoxidized by CuOOH. This hypothesis was tested *in vitro* using the FOX  
 260 assay at increasing CuOOH concentrations (Figure 3A). A significant inhibition of H<sub>2</sub>O<sub>2</sub> detoxification

261 could be detected in the presence of 12.5  $\mu\text{M}$  CuOOH and the peroxidase activity was undetectable  
262 at high CuOOH concentration. To further address the possibility for overoxidation of PRX-IIIE by  
263 CuOOH, ESI-MS analysis was carried out (Figure 2 B). In contrast to reduced PRX-IIIE with a  
264 molecular mass of 19438.0 Da, the sample treated with 0.5 mM CuOOH showed a mass increase of  
265 ~32 Da which corresponds to the formation of the sulfinic acid derivative (-SO<sub>2</sub>H). Higher CuOOH  
266 concentrations lead to further oxidation to the sulfonic acid (-SO<sub>3</sub>H).

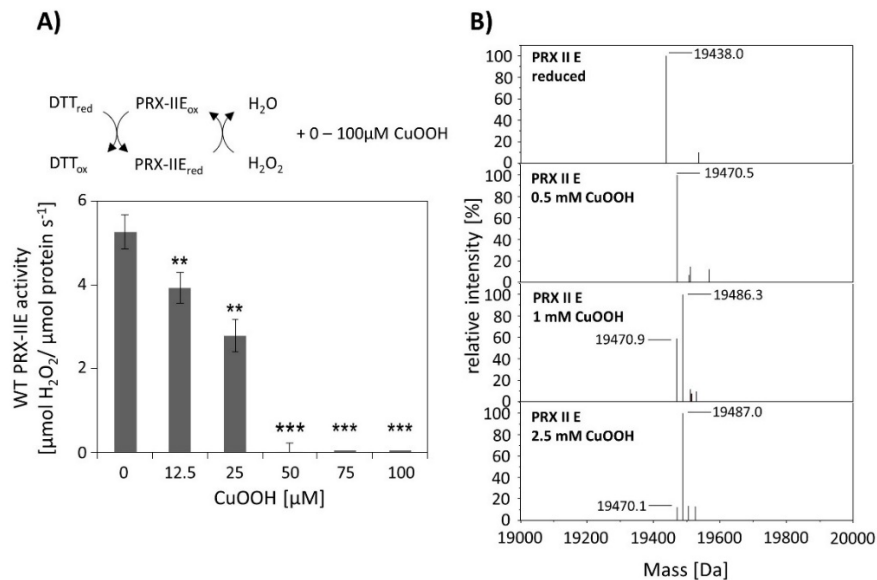

267

268 **Figure 3 Hyperoxidation of PRX-IIIE.** A) Activity of 2  $\mu\text{M}$  PRX-IIIE was determined with 400  $\mu\text{M}$  H<sub>2</sub>O<sub>2</sub>  
269 as substrate and 4 mM DTT using the FOX assay. CuOOH concentrations >50  $\mu\text{M}$  completely  
270 inhibited the peroxidase activity. Data are means  $\pm$  SD, n = 9 with protein of three independent protein  
271 purifications. \*\*: p < 0.01; \*\*\*: p < 0.001. B) Deconvoluted ESI-MS spectra of wild-type PRX-IIIE after  
272 treatment with CuOOH as described in Materials and Methods. 19438.0 is the expected mass of the  
273 reduced (-SH), His-tagged PRX-IIIE protein. The peak at 19470.5 Da after incubation with 0.5 mM  
274 CuOOH shows a mass increase by 32 Da, which corresponds to the formation of the sulfinic acid  
275 derivative (-SO<sub>2</sub>H). Higher CuOOH concentrations lead to further oxidation to the sulfonic acid  
276 (-SO<sub>3</sub>H). Data are representative spectra of n = 15 measurements with protein of three independent  
277 protein purifications.

278 ESI-MS analysis of cysteine variants of PRX-IIIE was performed to elucidate which of the two  
279 cysteines was modified (Table 1). Deconvoluted data revealed that hyperoxidation occurs in the  
280 C146S variant, lacking the Cys<sub>R</sub>, while the PRX-IIIE protein variant lacking Cys<sub>P</sub> (C121S) showed only  
281 a slight oxidation at high CuOOH concentrations.

282 **Table 1 CuOOH-dependent thiol modifications of PRX-IIIE variants.** Proteins were treated with  
283 DTT and CuOOH for 1 h at RT and then analyzed by ESI-MS. Generation of the oxidized (-SOH) and  
284 hyperoxidized (-SO<sub>2</sub>H, -SO<sub>3</sub>H) forms increased the mass of the protein by 16, 32 or 48 Da. Data are  
285 means  $\pm$  SD, n = 10 with protein from two independent purifications.

| Treatment             | PRX-IIIE C121S                       |                              | PRX-IIIE C146S                                           |                                                                                       |
|-----------------------|--------------------------------------|------------------------------|----------------------------------------------------------|---------------------------------------------------------------------------------------|
|                       | Mass [Da]                            | Cys modification             | Mass [Da]                                                | Cys modification                                                                      |
| 5 mM DTT<br>(control) | 19,422.93 ± 0.61                     | None (SH)                    | 19,422.22 ± 0.52                                         | None (SH)                                                                             |
| 0.5 mM CuOOH          | 19,422.75 ± 0.57                     | None (SH)                    | 19,422.57 ± 0.55<br>19,454.61 ± 0.44                     | None (SH)<br>Hyperoxidation (SO <sub>2</sub> H)                                       |
| 1 mM CuOOH            | 19,423.13 ± 0.22                     | None (SH)                    | 19,422.86 ± 0.87<br>19,454.93 ± 0.62                     | None (SH)<br>Hyperoxidation (SO <sub>2</sub> H)                                       |
| 2.5 mM CuOOH          | 19,423.31 ± 0.17                     | None (SH)                    | 19,422.46 ± 0.86<br>19,454.51 ± 0.92<br>19,471.37 ± 0.81 | None (SH)<br>Hyperoxidation (SO <sub>2</sub> H)<br>Hyperoxidation (SO <sub>3</sub> H) |
| 5 mM CuOOH            | 19,422.95 ± 0.54                     | None (SH)                    | 19,422.52 ± 0.41<br>19,453.86 ± 0.53<br>19,470.75 ± 0.96 | None (SH)<br>Hyperoxidation (SO <sub>2</sub> H)<br>Hyperoxidation (SO <sub>3</sub> H) |
| 10 mM CuOOH           | 19,422.97 ± 0.57<br>19,438.11 ± 0.92 | None (SH)<br>Oxidation (SOH) | 19,423.25 ± 0.69<br>19,454.14 ± 0.98<br>19,470.73 ± 0.81 | None (SH)<br>Hyperoxidation (SO <sub>2</sub> H)<br>Hyperoxidation (SO <sub>3</sub> H) |

286  
287  
288  
289  
290  
291  
292  
293  
294  
295  
296

Activity measurements for PRX-IIIE revealed that H<sub>2</sub>O<sub>2</sub> is the preferred substrate (Figure 2B), but H<sub>2</sub>O<sub>2</sub> is also known to catalyze hyperoxidation of proteins [18]. To test this for PRX-IIIE, peroxide-mediated hyperoxidation was analyzed by ESI-MS (Figure 4). The extent of sulfinic acid formation was tentatively estimated from the ratio of the peak intensities for the reduced (-SH, 19438.0 Da) and hyperoxidized (-SO<sub>2</sub>H, 19470.0 Da) protein in the deconvoluted ESI-MS spectra. Incubation of PRX-IIIE with 25 μM H<sub>2</sub>O<sub>2</sub> resulted in an hyperoxidation rate of 46 %, and higher peroxide concentrations lead to further hyperoxidation of the protein. Masses that correspond to the sulfonic acid (-SO<sub>3</sub>H) could not be detected, suggesting that H<sub>2</sub>O<sub>2</sub>-mediated hyperoxidation is limited to the formation of the sulfinic acid derivative at Cys<sub>SP</sub>.

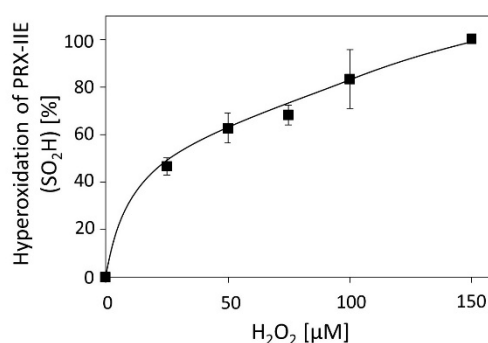

297  
298  
299  
300  
301

**Figure 4 H<sub>2</sub>O<sub>2</sub>-dependent hyperoxidation of PRX-IIIE.** The extent of sulfinic acid formation in percent of total was estimated from the ratio of the peak intensities for the reduced (SH; 19.438 Da) and hyperoxidized (SO<sub>2</sub>H; 19.470 Da) protein in the deconvoluted ESI-MS spectra. Data are means of n = 10 ± SD with recombinant protein from two independent purifications.

### 302 3.4. S-Glutathionylation of PRX-IIIE occurs at Cys<sub>SP</sub>

303 The results shown above revealed a lower peroxidase activity for PRX-IIIE with GRXs as electron  
304 donor in comparison to DTT as reductant (Figure 2C). The antioxidant glutathione is one component



305 of the assay. In addition, H<sub>2</sub>O<sub>2</sub>-dependent hyperoxidation of PRX-IIIIE could be observed (Figure 4).  
306 For *A. thaliana* and *T. brucei* reversible S-glutathionylation, the addition of one glutathione molecule  
307 to specific cysteine residues, has been shown to prevent 2-Cys PRX to hyperoxidize and thereby  
308 regulates its function [30,31]. In order to analyze the possibility for this redox-related  
309 posttranslational modification, reduced PRX-IIIIE was incubated with either 0.5 mM DTT or 10 mM  
310 oxidized glutathione (GSSG) overnight at 4°C. Following acetone precipitation samples were  
311 subjected to ESI-MS and intact masses of the protein were obtained (Figure 5)  
312

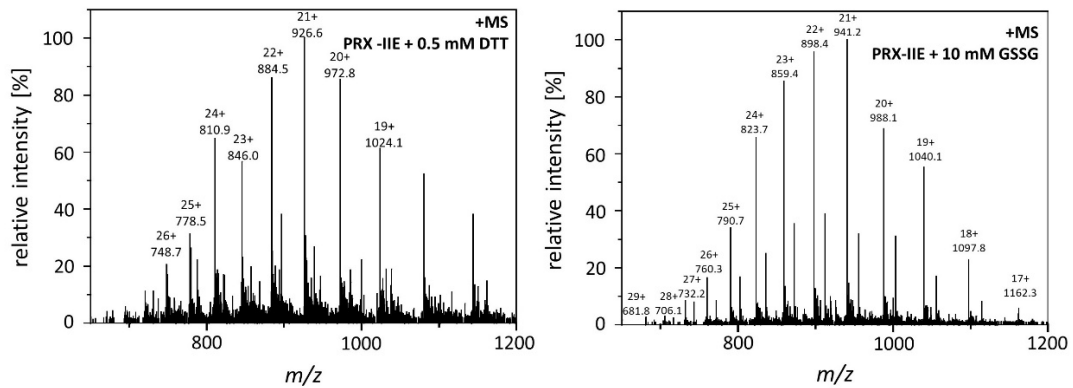

313

314 **Figure 5 Mass spectra of reduced and S-glutathionylated PRX-IIIIE.** S-glutathionylation was carried  
315 out by disulfide exchange with GSSG. The reaction mixtures containing 30  $\mu$ M reduced PRX-IIIIE  
316 without (left diagram) or with 10 mM GSSG (right diagram) in Tris buffer, pH 8.0, were incubated at  
317 4°C for 18 h. The protein products were precipitated and subsequently subjected to ESI-MS analysis.

318 Deconvoluted data revealed the addition of one glutathione residue that increased the mass of  
319 the protein by 306 Da (Figure 6A). The PTM of PRX-IIIIE was further proven with specific anti-GSH  
320 antibody (Figure 6B). In addition, S-glutathionylation of PRX-IIIIE at low physiological GSSG  
321 concentrations could be observed (Figure 6A). The time-dependent S-glutathionylation *in vitro*  
322 was detected after incubation with GSSG for different time periods (Figure 6C). Thiol modification was  
323 observed already after 10 min and reached a maximum at 60 min. The results demonstrate the fast S-  
324 glutathionylation of PRX-IIIIE at physiological relevant concentrations *in vitro*. Not only incubation of  
325 PRX-IIIIE with GSSG results in S-glutathionylation, but also incubation of pre-reduced PRX-IIIIE with  
326 1 or 5 mM S-nitrosoglutathione. Besides this, formation of N-nitrosation (19.469 kDa, -SNO) and S-  
327 nitrosoglutathionylation (19.772 kDa, -SSGNO) was observed, using ESI-MS.  
328

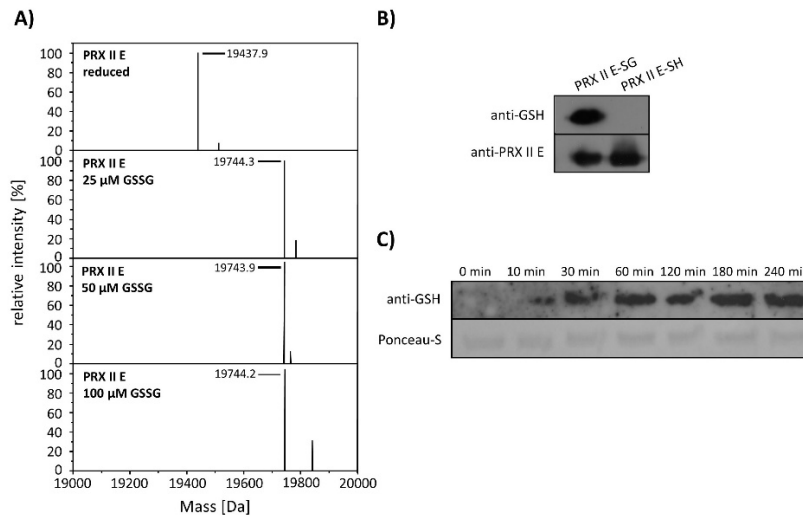

329

330

331

332

333

334

335

336

337

**Figure 6 S-glutathionylation of PRX-III E.** A) Deconvoluted mass spectra of reduced and S-glutathionylated PRX-III E after treatment with oxidized glutathione (GSSG). Reduced PRX-III E (19,438 Da) was treated with indicated GSSG concentrations and the degree of modification was estimated from the mass shift of 306 Da to 19744 Da, which could be assigned to monoglutathionylated protein. Data are representative spectra of  $n = 12$ , with protein from three independent protein purifications. B) Western blot analyses of reduced and S-glutathionylated PRX-III E (treatment with 10 mM GSSG) using specific anti-GSH and anti-PRX-III E antibody. C) Time dependence of S-glutathionylation with recombinant PRX-III E *in vitro*.

338

339

340

341

342

343

344

345

To test for the particular residue that is prone to S-glutathionylation, Cys to Ser variants were analyzed using Western Blot with specific anti-GSH antibody. Results showed S-glutathionylation of WT PRX-III E and the C146S variant, but not on the C121S variant (Figure 7). Furthermore, mass spectrometry was done with the WT and the Cys→Ser variants. 19422 Da correspond to the reduced variants with single mutated cysteine residues (C121S or C146S) and 19406 Da to the double mutant. Only the C146S protein, lacking the Cys<sub>R</sub> at position 146, was S-glutathionylated in a concentration-dependent manner of GSSG (Figure 7B).

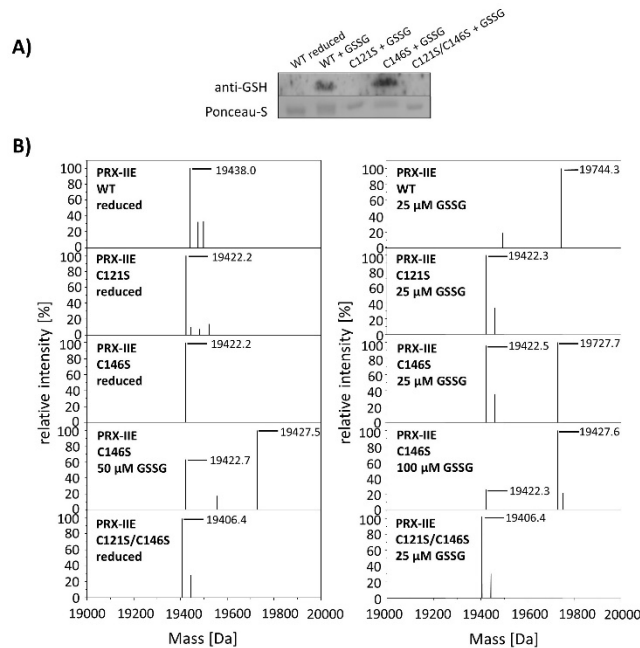

346

347

348

**Figure 7 Identification of S-glutathionylated Cys residue in PRX-III E using Cys→Ser variants.** To test for the site of glutathionylation, Cys→Ser mutated PRX-III E variants were analyzed by Western

349 blot with specific anti-GSH antibody and by mass spectroscopy. A) 10  $\mu$ M reduced WT PRX-IIIE and  
 350 variants (C121S; C146S; C121S/C146S) were incubated with 10 mM GSSG for 1 h at RT and subjected  
 351 for Western blot analysis. B) Representative deconvoluted ESI-MS spectra of PRX-IIIE and variants  
 352 treated with GSSG. 19438 Da corresponds to the theoretical mass of the reduced and His-tagged  
 353 protein, whereas a shift of 306 Da to 19744 was observed for the glutathionylated version of PRX-IIIE  
 354 with a single bound glutathione molecule. 19422 Da correspond to the reduced variants with single  
 355 mutated cysteinyl residues (C121S; C146S) and 19406 Da to the double mutant. Only the C146S  
 356 protein, lacking the Cys<sub>SR</sub>, was glutathionylated in a concentration-dependent manner. The figure  
 357 shows representative spectra of n = 6 determinations, using two independent protein purifications.

358 Next, the effect of S-glutathionylation on peroxidase activity was investigated using a modified  
 359 FOX assay (Figure 8A). Peroxidase activity in the presence of GRX-S12, GSH and H<sub>2</sub>O<sub>2</sub> as substrate  
 360 decreased in the presence of GSSG amounts as low as < 2.5 % GSSG of total glutathione. The extent  
 361 of glutathionylation was tested by ESI-MS at different GSH/GSSG ratios (Figure 8B). Deconvoluted  
 362 spectra showed the presence of PRX-IIIE-SG already at 1.25 % GSSG, which is in line with the  
 363 decreased peroxidase activity. Protein-SG forms through several mechanisms *in vitro*, however the  
 364 precise reaction mechanism *in vivo* remains unclear [32]. In contrast, deglutathionylation reaction is  
 365 reported to be catalyzed by GRXs and SRXs [33,34]. To monitor the deglutathionylation of PRX-IIIE,  
 366 PRX-IIIE-SG was incubated with GSH in the presence or absence of GRX-S12, GRX-C5 and SRX  
 367 (Figure 8C). Western blot analysis with specific GSH antibody revealed a decrease in signal intensity  
 368 for PRX-IIIE-SG after 20 min of reaction time with GSH alone. The addition of SRX or GRX did not  
 369 increase the deglutathionylation reaction, leading to the conclusion that the glutathione pool itself is  
 370 capable of modulating the redox state of PRX-IIIE.

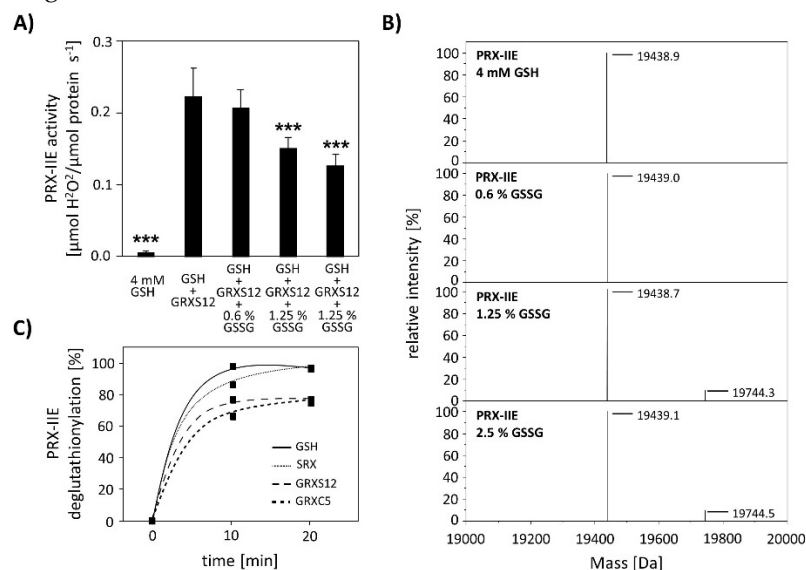

371  
 372 **Figure 8 Effect of glutathionylation on peroxidase activity and deglutathionylation reaction.** A)  
 373 Titration of peroxidase activity of PRX-IIIE in the presence of GRX-S12, GSH and H<sub>2</sub>O<sub>2</sub> and increasing  
 374 amounts of GSSG using the FOX assay. Glutathionylation and inhibition of activity occurred at <2.5 %  
 375 GSSG of total glutathione. Data are means of n=10  $\pm$  SD with protein of two independent protein  
 376 purifications; \*\*\* p  $\leq$  0.001. B) PRX-IIIE was treated with different GSH/GSSG ratios and  
 377 glutathionylation was determined via ESI-MS. Deconvoluted spectra reveal the presence of  
 378 glutathionylated PRX-IIIE already at 1.25 % GSSG. (C) Time course of the deglutathionylation reaction.  
 379 10  $\mu$ M PRX-IIIE-SG were incubated together with 0.5 mM GSH and equal amounts of sulfiredoxin  
 380 (SRX), GRX-S12 or GRX-C5 in 100 mM Tris-HCl, pH 8.0, at 37  $^{\circ}$ C for indicated time and the decrease  
 381 in signal intensity was monitored over time using anti-glutathione antibody.

382 Protein S-glutathionylation ensures protection of critical protein thiols against irreversible  
 383 overoxidation *in vivo* and is therefore considered as biomarker for oxidative stress [35,36]. To test  
 384 redox-dependent posttranslational modifications of PRX-IIIE *in vivo*, *A. thaliana* plants were sprayed

385 with a single dose of 300  $\mu$ M methylviologen, harvested after 3 h and analyzed using non-reducing  
386 two-dimensional gel electrophoresis following Western blot with specific anti-PRX-IIIE antibody. In  
387 contrast to the mock treated samples, which showed two protein spots representing reduced (-SH)  
388 and presumably oxidized protein species, plants stressed with MV exhibited three distinct protein  
389 spots, two of them differed in acidity and molecular mass (Figure 9). Mature PRX-IIIE-SH displays a  
390 molecular mass of 17260 Da with a theoretical pI value of 5.02, whereas for PRX-IIIE-SG a mass shift  
391 to 17566 Da and a more acidic pI value of 4.91 are predicted. Molecular mass and pI values were  
392 obtained using the ExPASy ProtParam tool [37]. Theoretical pI calculations and correlation with the  
393 pI values observed on the 2D gels together with the mass change, suggest that the acidic spots of the  
394 triplet correspond to the glutathionylated protein.

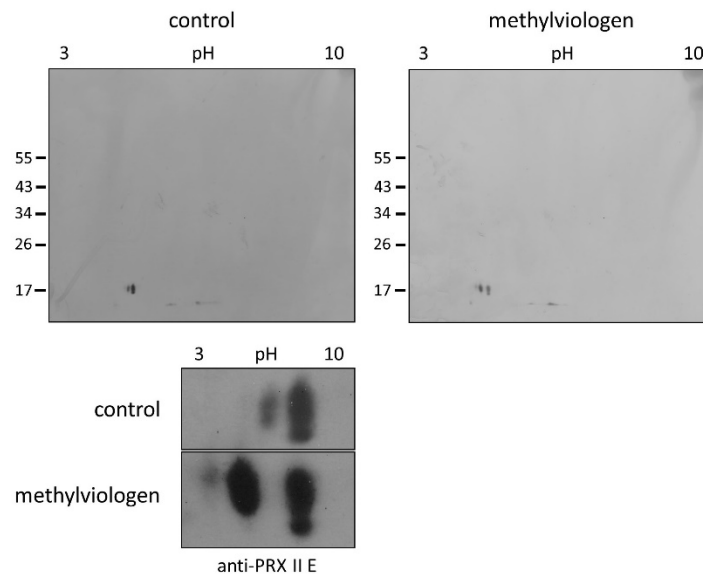

395

396 **Figure 9 Detection of glutathionylated PRX-IIIE species *in vivo*.** *A. thaliana* plants were stressed for  
397 3 h with 300  $\mu$ M MV or 0.1 % (v/v) Tween-20 as control. S-glutathionylation was detected with specific  
398 anti-PRX-IIIE antibody following separation by non-reducing 2D-SDS-PAGE and blotting. The figure  
399 shows representative Western blots from two independent experiments.

### 400 3.5. Identification of PRX-IIIE interaction partners

401 The next experiments aimed to elucidate, whether PRX-IIIE exclusively functions as a peroxidase  
402 or if it might be involved in cell signaling by direct protein-protein interactions. For that, an affinity  
403 chromatography approach with immobilized His<sub>6</sub>-tagged PRX-IIIE and total *A. thaliana* leaf protein  
404 was used to identify interacting proteins. After washing, bound proteins were eluted with buffer  
405 containing DTT or imidazole. They were subsequently identified by mass spectrometry. In addition,  
406 a thiol-trapping experiment with the C146S variant was used in order to identify redox-regulated  
407 proteins that preferentially interact through the Cys<sub>p</sub>. The reductive elution with DTT resulted in the  
408 identification of 47 proteins, 14 of which were also identified to interact with the C146S variant  
409 (Figure 10A). To address proteins that interact with PRX-IIIE electrostatically, a second elution was  
410 done with imidazole. Seven proteins co-eluted with PRX-IIIE, and 9 with the PRX-IIIE C146S variant  
411 (Figure 10B). Out of the 54 proteins that interacted with PRX-IIIE, 24 are localized within the  
412 chloroplast and half of them are involved in metabolic pathways (Figure 10C). However, in  
413 comparison to the WT protein, almost the same number of proteins were trapped by the C146S  
414 variant, but only 14 of them reside in the chloroplast (Figure 10D).

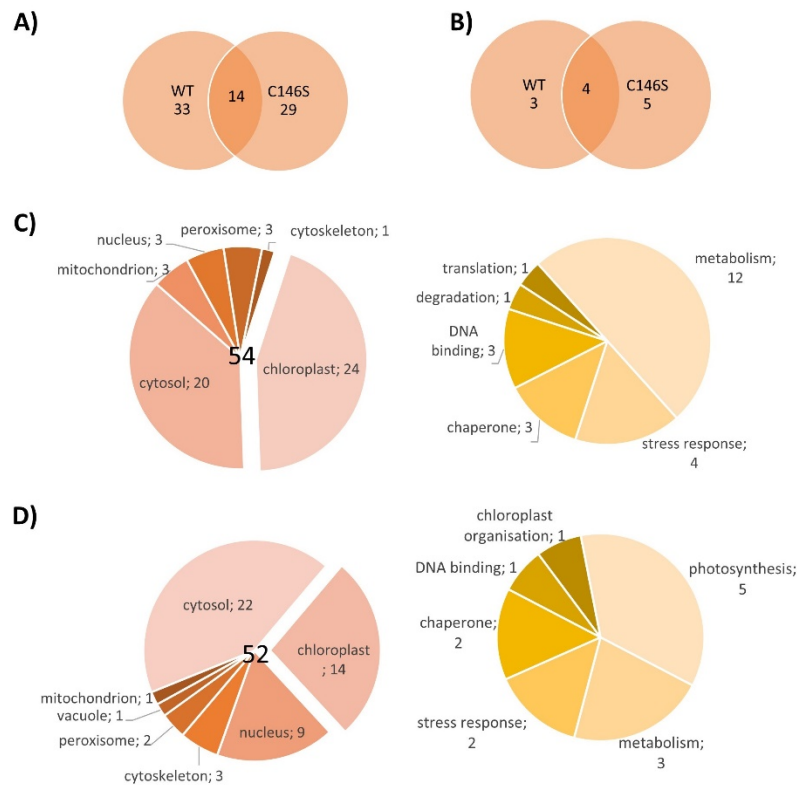

415

416

417

418

419

420

**Figure 10 Localization and function of PRX-IIIE interaction partners.** Venn diagrams depicting unique and overlapping interactors of PRX-IIIE WT and C146S variant after A) elution with DTT and B) second elution with imidazole. Identified interacting proteins with C) PRX-IIIE WT or D) PRX-IIIE C146S during first and second elution, were grouped according to their localization and function. See also supplementary file.

421

422

423

424

425

426

427

428

429

430

431

Interestingly, 4 out of the 24 identified chloroplast proteins trapped by the WT PRX-IIIE protein belong to the 14-3-3 family (Table 2). In total 6 different 14-3-3 proteins were identified regardless of the bait protein (Table S 2). Plant 14-3-3 proteins are reported to be involved in multiple developmental and stress related processes, such as apoptosis, leaf shape and salt stress tolerance [38–40]. They normally occur as homodimers or heterodimers and are able to bind two different targets at the same time and, therefore, act as scaffold proteins [41]. Furthermore, they are involved in signaling processes regulated by phosphorylation [42–44]. Since PRX-IIIE has three experimentally reported phosphorylation sites [45], an interaction between PRX-IIIE and a 14-3-3 protein could be part of a signaling process. To study the interaction between PRX-IIIE and 14-3-3 proteins in more detail, 14-3-3 *v* was chosen as a representative for the 14-3-3 protein family and used in further experiments.

432

433

434

**Table 2 Chloroplast localized interaction partners of PRX-IIIE WT.** Listed are the proteins identified from elution with DTT (above the line) and imidazole (below the line), with AGI code and uniprot accession number

| AGI code  | Protein accession | Protein name                                     |
|-----------|-------------------|--------------------------------------------------|
| AT4G09000 | P42643            | 14-3-3 $\chi$                                    |
| AT5G10450 | P48349            | 14-3-3 $\lambda$                                 |
| AT3G02520 | Q96300            | 14-3-3 <i>v</i>                                  |
| AT5G16050 | P42645            | 14-3-3 $\nu$                                     |
| AT3G60880 | Q9LZX6            | 4-Hydroxy-tetrahydrodipicolinate synthase 1      |
| AT1G02560 | Q9S834            | ATP-dependent Clp protease proteolytic subunit 5 |
| AT5G03690 | F4KGQ0            | Fructose-bisphosphate aldolase 4                 |
| AT4G26530 | O65581            | Fructose-bisphosphate aldolase 5                 |

|           |        |                                             |
|-----------|--------|---------------------------------------------|
| AT5G49910 | Q9LTX9 | Heat shock 70 kDa protein 7                 |
| AT2G24200 | P30184 | Leucine aminopeptidase 1                    |
| AT5G45930 | Q5XF33 | Magnesium-chelatase subunit ChII-2          |
| AT1G70890 | Q9SSK5 | MLP-like protein 43                         |
| AT5G26000 | P37702 | Myrosinase 1                                |
| AT3G62030 | P34791 | Peptidyl-prolyl cis-trans isomerase CYP20-3 |
| AT2G29630 | O82392 | Phosphomethylpyrimidine synthase            |
| AT5G52920 | Q9FLW9 | Plastidial pyruvate kinase 2                |
| AT1G32440 | Q93Z53 | Plastidial pyruvate kinase 3                |
| AT5G52520 | Q9FYR6 | Proline tRNA ligase                         |
| AT2G21170 | Q9SKP6 | Triosephosphate isomerase                   |
| AT4G17090 | O23553 | $\beta$ -amylase 3                          |
| AT3G01500 | P27140 | $\beta$ -carbonic anhydrase 1               |
| AT5G14740 | P42737 | $\beta$ -carbonic anhydrase 2               |
| AT5G64460 | Q9FGF0 | Phosphoglycerate mutase-like protein 1      |

435

436

437

438

439

440

441

442

443

444

To characterize the interaction between 14-3-3  $\nu$  and PRX-IIIE, phospho-mimicry variants of PRX-IIIE were generated and their peroxidase activity was analyzed using the FOX-Assay. Interestingly, all variants revealed lower peroxidase activity in comparison to WT PRX-IIIE, whereas S82D and T108E showed a significant lower activity (Figure 11A). Binding between PRX-IIIE or its phosphomimic variants and 14-3-3  $\nu$  under defined redox-conditions conditions was assessed in an overlay approach (Figure 11B). Binding was similar under all conditions apart from the 2.5-fold improved binding of WT PRX-IIIE to 14-3-3  $\nu$  under oxidizing conditions (Figure 11B). Supplementation with 14-3-3  $\nu$  had a beneficial effect on peroxidase activity albeit a five-fold excess of 14-3-3  $\nu$  was necessary to observe a significant increase of PRX-IIIE peroxidase activity (Figure 11C).

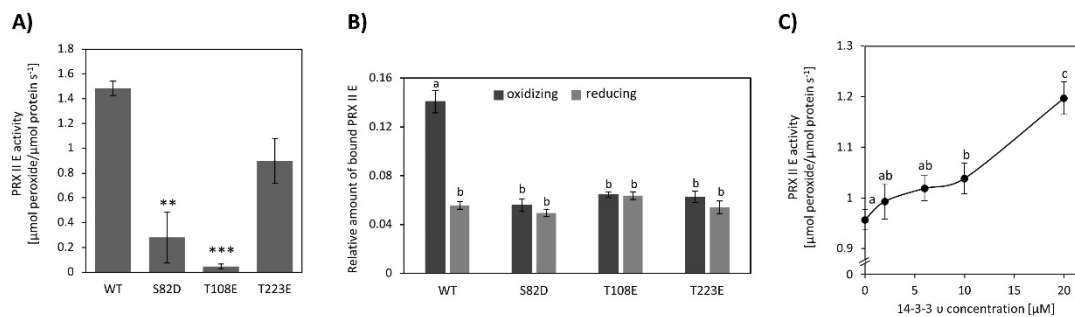

445

446

447

448

449

450

451

452

453

454

455

456

**Figure 11 Influence of phospho-mimicry point-mutations on the activity of PRX-IIIE and the interaction with 14-3-3  $\nu$ .** A) Peroxide reduction by wildtype PRX-IIIE and its phospho-mimicry variants were measured with 400  $\mu$ M  $H_2O_2$ , 4 mM DTT and 2  $\mu$ M protein. The decrease in  $H_2O_2$  was quantified with the FOX assay. Data are means of  $n = 10-16 \pm SE$  with protein from three independent protein purifications. Significant differences to the WT protein were calculated using Student T-Test whereas \*\*:  $p < 0.01$ ; \*\*\*  $p < 0.001$ . B) Overlay assay of 14-3-3  $\nu$  with PRX-IIIE. A higher affinity of PRX-IIIE to 14-3-3  $\nu$  was observed under oxidizing conditions. Data are means of  $n = 13-22 \pm SD$ . Significant differences were calculated using Student T- Test and are indicated by different letters  $p \leq 0.05$ . C) Influence of 14-3-3  $\nu$  on the peroxidase activity of PRX-IIIE. The activity of PRX-IIIE was measured in the presence of different concentrations of 14-3-3  $\nu$  with FOX Assay. Data are means of  $n= 12-18 \pm SE$ . Different letters indicate significant differences calculated with Student T-Test at  $p \leq 0.05$ .

457

## 458 4. Discussion

459 PRX-IIIE is a thiol dependent peroxidase that is localized to the chloroplast stroma (Figure 1C, D).  
460 Two cysteinyl residues are highly conserved within the type II PRX (Figure 1A) and mutation of  
461 either one or both cysteines to serine results in a loss of peroxidase activity (Figure 2A). Therefore,  
462 both Cys, namely Cys<sub>p</sub>121 and Cys<sub>sr</sub>146, are essential for the PRX-IIIE peroxidase activity.

463 The human homologue peroxiredoxin 5 (PRDX5) more readily reduces t-BOOH [46], while PRX-  
464 IIE from *A. thaliana* showed the highest activity with H<sub>2</sub>O<sub>2</sub> as substrate (Figure 2B, C). The differences  
465 in substrate specificity could be due to the different accessible surface areas of Cys<sub>p</sub> of both enzymes.  
466 The accessible surface area of the Cys<sub>p</sub> of PRDX5 is 1.305 Å<sup>2</sup>, whereas the accessible surface area of  
467 the PRX-IIIE Cys<sub>p</sub> is just 0.795 Å<sup>2</sup> (Figure 1B). Therefore, PRX-IIIE seems more likely to detoxify smaller  
468 peroxides in comparison to the human analogue PRDX5.

### 469 4.1. Regeneration of reduced PRX-IIIE limits catalytic turnover

470 The GRX-S12-coupled assay revealed the same substrate preference as the FOX assay, however,  
471 the catalytic activities were lower in comparison to the DTT-driven activity, especially in case of H<sub>2</sub>O<sub>2</sub>  
472 as substrate (Figure 2C). Since activity measurements with t-BOOH showed almost the same values,  
473 it seems that PRX-IIIE regeneration by GRX-S12 is the rate-limiting step in the catalytic cycle of  
474 peroxide reduction, disulfide formation and regeneration.

### 475 4.2. Bulky substrates favour hyperoxidation and inhibition of PRX-IIIE

476 Activity was undetectable in both assays using CuOOH as substrate, and rather bulky substrates  
477 like CuOOH inhibit peroxidase activity, which was already reported for *poplar* PRX-IIIE [14]. The  
478 inhibitory effect of CuOOH on the peroxidase activity of PRX-IIIE was revealed by the decreased  
479 H<sub>2</sub>O<sub>2</sub>-reduction activity in the presence of increasing CuOOH concentrations. Already the presence  
480 of 12.5 μM CuOOH resulted in a significant decrease in PRX-IIIE peroxidase activity (Figure 3A) and  
481 the inhibition of activity correlated with hyperoxidation of PRX-IIIE (Figure 3B).

482 ESI-MS measurements of CuOOH-treated PRX-IIIE C121S and C146S variants proved  
483 hyperoxidation of the C121 to sulfinic (-SO<sub>2</sub>H) and sulfonic acid (SO<sub>3</sub>H) at low amounts of CuOOH  
484 (Table 1). Oxidation of C146 to sulfenic acid (-SOH) only occurred after treatment with relatively high  
485 CuOOH concentrations. H<sub>2</sub>O<sub>2</sub> treatment only resulted in oxidation of PRX-IIIE to the sulfenic acid  
486 derivative in contrast to 2-CysPRX, where hyperoxidation occurs after about 250 peroxidase cycles  
487 (Figure 4) [47]. Oxidized sulfenylated 2-CysPRX functions in proximity-based oxidation. Sobotta et  
488 al [48] reported this type of signaling cascade, where human PRDX2 gets oxidized by ROS and  
489 afterwards oxidizes STAT3. Disulfide-bonded 2-CysPRX from *A. thaliana* oxidizes chloroplast TRXs  
490 which in turn oxidize target proteins in the Calvin-Benson cycle or malate dehydrogenase [8]. This  
491 type of regulation was termed TRX oxidase function of 2-CysPRX and participates in adjustment of  
492 enzyme activity to decreased light intensity. PRX-IIIE could also be part of a ROS-induced signaling  
493 cascade, whereas PRX-IIIE oxidizes a nearby protein.

494 Hyperoxidized PRX may also function in cell signaling, e.g. if the change in redox-state affects  
495 its conformational state which in turn allows for binding to other proteins and alters their activity  
496 [49]. Pea mitochondrial PRX-IIIF adopts a hexameric conformation in addition to its dimeric form and  
497 tightly binds thioredoxin-o [50].

### 498 4.3. Besides hyperoxidation, Cys121 of PRX-IIIE is subject to multiple posttranslational modifications

499 Apart from oxidation and hyperoxidation, PRX-IIIE is also S-glutathionylated (Figure 5 and  
500 Figure 6). Although glutathionylation of PRX-IIIE inhibited its peroxidase activity (Figure 8A),  
501 S-glutathionylation of Cys<sub>p</sub> (Figure 7) may prevent PRX-IIIE from hyperoxidation, like it was already  
502 shown for glyceraldehyde-3-phosphate-dehydrogenase (GAPDH) from spinach and isocitrate lyase  
503 from *C. reinhardtii* [51,52]. Reversal of this type of regulation of PRX-IIIE could be achieved by  
504 deglutathionylation via GRXs, TRXs and SRXs [53–55]. However, the presence of GRX-S12, SRX or

505 GRX-C5 failed to increase the de-glutathionylation rate in comparison to GSH alone, indicating that  
506 the GSH/GSSG ratio could be the main route for the regulation of this PTM *in vivo*.

507 Under normal physiological relevant concentrations of ~1 mM glutathione [56] and a ratio of  
508 0.002 % oxidized glutathione [57], PRX-IIIE should not be glutathionylated. Application of stresses to  
509 the plant, like exposure to methylviologen or arsenic treatment can, however, alter the GSSG ratio  
510 [58,59] and, therefore, may result in S-glutathionylation of PRX-IIIE. This is consistent with the results  
511 shown in Figure 9, where application of severe stress resulted in S-glutathionylation of PRX-IIIE. This  
512 post-translational modification could prevent PRX-IIIE from hyperoxidation. In addition, reversible  
513 S-glutathionylation of PRX-IIIE could take part in PRX-dependent signal transduction and regulation  
514 of the redox homeostasis [60].

#### 515 4.4. PRX-IIIE binds to target proteins

516 Besides post-translational control of activity, protein-protein interactions alter functions and  
517 properties of binding partners. PRX-IIIE protein interactions mostly seem to be redox-regulated, since  
518 most of the trapped proteins were eluted with DTT (Figure 10A, B). In total 54 proteins were  
519 identified to interact with PRX-IIIE. Since PRX-IIIE is located in plastids, we focused on the 24 proteins  
520 with plastidial localization. However also the other proteins deserve attention since they might  
521 interact with the cytosolic type II PRXs which display high similarity with PRX-IIIE (Figure 1A). Most  
522 of the identified proteins are known targets of redox regulation [61] like cyclophilin 20-3 [55] or  $\beta$ -  
523 carbonic anhydrase [62].

#### 524 4.5. 14-3-3 proteins as binding partner of PRX-IIIE open up new perspectives

525 14-3-3 proteins function as molecular adapters and their identification as binding partners of  
526 PRX-IIIE appeared interesting and novel. They are present in various isoforms in plant genomes and  
527 act as homo- and heterodimers [63]. 14-3-3 proteins are able to integrate and control multiple  
528 pathways like the abscisic acid-dependent transcription of embryo-specific target genes [64]. They  
529 participate in regulation of salt stress tolerance and apoptotic signaling transduction [38,39].  
530 Furthermore, they function in development of cotyledons [40]. The 14-3-3  $\nu$  isoform co-controls the  
531 cell proliferation cycle and induces the division of chloroplasts, which results in an increased plastid  
532 number, chlorophyll content and photosynthetic activity [40].

533 In this study, four 14-3-3 proteins could be identified to interact with PRX-IIIE WT. 14-3-3  
534 proteins are known to preferentially bind to phosphorylated motifs containing phosphoserine  
535 residues [65,66]. In addition, pThr-dependent binding as well as non-phosphorylation dependent  
536 interactions with target proteins were reported [67]. Phospho-mimetic variants of PRXIIIE have been  
537 used to further address the binding properties to 14-3-3  $\nu$  under defined redox-conditions. However,  
538 preferential binding of 14-3-3  $\nu$  to these variants could not be detected under reducing as well as  
539 oxidizing conditions. Instead, the highest binding could be observed for WT PRX-IIIE under oxidizing  
540 conditions (Figure 11B). In addition, introducing negative charges at positions S82, T108 and T223,  
541 resulted in an inhibition of the thiol peroxidase activity (Figure 11A). Similar results have been  
542 reported for human PRX2, where Cdk5-derived phosphorylation at T89 had a negative effect on its  
543 activity [68].

544 To check, if the interaction of 14-3-3  $\nu$  and PRX-IIIE under oxidizing conditions may alter the  
545 peroxidase activity, the H<sub>2</sub>O<sub>2</sub> reduction by PRX-IIIE was determined using the FOX assay in the  
546 presence or absence of 14-3-3 $\nu$  (Figure 11C). A fivefold excess of 14-3-3  $\nu$  increased the peroxidase  
547 activity of PRX-IIIE significantly. Since such a high amount of 14-3-3  $\nu$  is necessary to alter the PRX-IIIE  
548 activity, it is more likely, that the interaction is important during signaling processes.

#### 549 4.6. Hypothetical outlook and where to go

550 Several mechanistic scenarios may be hypothesized. Formation of regulatory assemblies of PRX-  
551 IIE with homo- or heterodimers of 14-3-3 proteins may recruit additional binding partners. In such a  
552 regulatory complex, proximity-based oxidation between oxidized PRX-IIIE and reduced 14-3-3  $\nu$  or



553 the bound third partner could be the regulatory mechanism that leads to changes in function and  
554 regulation of cellular processes (Figure 12).

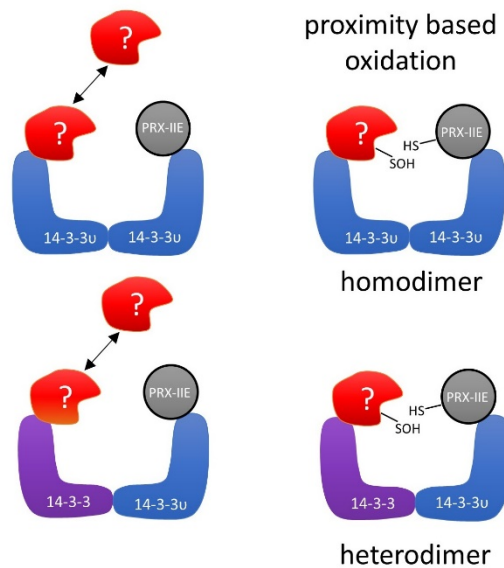

555

556 **Figure 12 Schematic depiction of the hypothetical interaction between PRX-IIIE and 14-3-3 v.**

557 Binding of oxidized PRX-IIIE to 14-3-3 v could induce association of a third partner. Formation of such  
558 a complex could facilitate redox regulation, e.g. by proximity-based oxidation. The hypothetical  
559 assembly may involve homo- or heterodimers of 14-3-3 isoforms.

560 As described previously, oxidative stress not just induces new interactions of 14-3-3 proteins  
561 with protein partners, but also results in a loss of homeostatic interactions [69]. Under oxidative stress  
562 in humans, the selenoprotein W binds to 14-3-3 with an intermolecular disulfide bridge. This process  
563 results in a release of apoptosis signal-regulating kinase-1 (ASK1) from the 14-3-3-ASK1 complex.  
564 ASK1 then activates the Jun N-terminal kinase and p38 MAP kinase pathways, which in turn activates  
565 caspases and thereby apoptosis [69,70]. Therefore, PRX-IIIE may affect several functions of 14-3-3 v.  
566 As indicated in figure 12, PRX-IIIE could induce dimerization of 14-3-3 v and, thereby, mediate the  
567 binding or release of other proteins. Further studies are needed to address the importance of PRX-IIIE  
568 on 14-3-3 complex formation and their associated signaling pathways. It will also be important to  
569 scrutinize the interaction of 14-3-3 proteins with the cytosolic PRX-IIB, C and D in the same functional  
570 scenario of facilitating redox regulatory assemblies.

571

572 **Supplementary Materials:** Table S1 Primers used in this study for cloning. Table S 2 Identified 14-3-3 proteins  
573 and their unique peptide. Supplement file list of identified proteins.

574 **Author Contributions:** Conceptualization, PT, AD; HPM. and KJD.; methodology, PT, AD, AM, AMJ.;  
575 validation, AD and PT.; formal analysis, AD, PT and AMJ.; investigation, PT, AD, DB and AMJ.; resources, AD,  
576 PT, AMJ, AM; data curation, AD, PT, AMJ and AM.; writing—original draft preparation, PT, AD and KJD.;  
577 writing—review and editing, all authors.; visualization, AD and PT.; supervision, KJD.; project administration,  
578 KJD.; funding acquisition, HPM and KJD. All authors have read and agreed to the published version of the  
579 manuscript.

580 **Funding:** This research was funded by the Deutsche Forschungsgemeinschaft (DFG) with the grants DI 346/14-  
581 2 (KJD), MO 479/11-1 (HPM) and DI 346/17-2 (KJD).

582 **Acknowledgments:**

583 The authors would like to thank Dr. Stephen Eyles, University of Massachusetts at Amherst, Mass Spectrometry  
584 Center for his help with data analysis.

585 **Conflicts of Interest:** The authors declare no conflict of interest. The funders had no role in the design of the  
586 study; in the collection, analyses, or interpretation of data; in the writing of the manuscript, or in the decision to  
587 publish the results.

588

589 **Table S1 Primers used in this study for cloning.**

| <b>Gene</b>       | <b>AGI</b> | <b>Restriction enzyme</b> |         | <b>Primer Sequence 5'→3'</b>        |
|-------------------|------------|---------------------------|---------|-------------------------------------|
| GRX-S12           | AT2G20270  | NdeI                      | Forward | TTTCCAACATATGGGATCGACATTGGAGGAGACTG |
|                   |            | BamHI                     | Reverse | TTTCAGGATCCCTAGGTCTGACCGTTTTTCC     |
| SRX               | AT1G31170  | NdeI                      | Forward | ACATATGAACGGTTCGCCCGGTGAT           |
|                   |            | BamHI                     | Reverse | AAAGGATCCTCAGCGAAGATGATGCCTTA       |
| PRX-IIIE          | AT3G52960  | NdeI                      | Forward | ATATACATATGGCCTCCATTTCCGTCGG        |
|                   |            | BamHI                     | Reverse | ATATAGGATCCTCAGAGAGCTTTAAGCATATC    |
| PRX-IIIE<br>C121S | AT3G52960  |                           | Forward | GGCGCATTACACCAACAAGCTCAC            |
|                   |            |                           | Reverse | GTGAGCTTGTTGGTGTGAATG               |
| PRX-IIIE<br>C146S | AT3G52960  |                           | Forward | AATCGCAAGTATCTCCGTCAAC              |
|                   |            |                           | Reverse | GACGGAGATACTTGCGATTACAT             |
| PRX-IIIE<br>S82D  | AT3G52960  |                           | Forward | GGTAGGAGAGAGTGTCTGTTGGGAGCTTGT      |
|                   |            |                           | Reverse | ACAAGCTCCCAGACGACACTCTCTCCTACC      |
| PRX-IIIE<br>T108E | AT3G52960  |                           | Forward | GAACGGCGAATAGGATTTCTTTCTTCCCGGCG    |
|                   |            |                           | Reverse | CGCCGGGAAGAAAGAAATCCTATTGCGCGTTC    |
| PRX-IIIE<br>T223E | AT3G52960  |                           | Forward | CTCAGCACTACTATTTTCAAAGCACCTCCTTC    |
|                   |            |                           | Reverse | GAAGGAGGTGCTTTTGAAAATAGTAGTGCTGAG   |
| PRX-IIIE-<br>EYFP | AT3G52960  | BamHI                     | Forward | ATATAGGATCCATGGCGACTTCTCTCCGTTTC    |
|                   |            | AgeI                      | Reverse | AAACCGGTGGGAGAGCTTTAAGCATATCCTCAG   |

590

Table S 2 Identified 14-3-3 proteins and their unique peptide.

| Protein          | AGI       | Unique identified peptides | Identified peptides | Unique Peptide sequences                                                                                                                                                                                                                                               | Localization                                           | reference  |
|------------------|-----------|----------------------------|---------------------|------------------------------------------------------------------------------------------------------------------------------------------------------------------------------------------------------------------------------------------------------------------------|--------------------------------------------------------|------------|
| 14-3-3 $\chi$    | AT4G09000 | 11                         | 25                  | DEFVYMAKLAEQAER<br>DEFVYMAKLAEQAERYEEMVEFMEK<br>DNLTWTSMDMQDDVADDIK<br>DSTLIMQLLRDNLTWTSMDMQDDVADDIK<br>DSTLIMQLLRDNLTWTSMDMQDDVADDIKEAAPAAAKPADEQQS<br>EESRGNDHVSILRDYR<br>GNDDHVSLIR<br>GNDDHVSLIRDYR<br>IETELSDICDGILK<br>KDAAEHTLTAYK<br>MATPGASSARDEFVYMAKLAEQAER | Cytosol,<br>nucleus,<br>chloroplast,<br>golgi, vacuole | [71–75]    |
| 14-3-3 $\omega$  | AT1G78300 | 0                          | 8                   |                                                                                                                                                                                                                                                                        | Cytosol,<br>nucleus                                    | [76]       |
| 14-3-3 $\varphi$ | AT1G78300 | 4                          | 14                  | DNLTWTSMDMQDESPEEIK<br>EEFVYLAKLAEQAERYEEMVEFMEK<br>GNDDHVTTIR<br>LAEQAERYEEMVEFMEKVAEAVDK                                                                                                                                                                             | Cytosol,<br>nucleus,<br>plasma<br>membrane             | [72,77,78] |
| 14-3-3 $\nu$     | AT5G16050 | 8                          | 17                  | ASWRIISSIEQKEDSR<br>DNLTWTSDLNDEAGDDIKEAPK<br>DSTLIMQLLRDNLTWTSDLNDEAGDDIK<br>EDSRGNSDHVSIK<br>ICDGILNLEAHLIPAASLAESK<br>LGLALNFSVFYIEILNSSDR<br>SAQDIALADLAPTHPIRLGLALNFSVFYIEILNSSDRACSLAK<br>VDEQAQPPPSQ                                                            | Chloroplast,<br>cytosol                                | [43]       |

| Protein  | AGI       | Unique identified peptides | Identified peptides | Unique Peptide sequences                                                                                                                  | Localization                                               | reference |
|----------|-----------|----------------------------|---------------------|-------------------------------------------------------------------------------------------------------------------------------------------|------------------------------------------------------------|-----------|
| 14-3-3 λ | AT5G10450 | 5                          | 7                   | DQYVYMAKLAEQAERYEEMVQFMEQLVTGATPAEELTVEER<br>QAFEEAIAELDTLGEESYK<br>QAFEEAIAELDTLGEESYKDSTLIMQLLR<br>YEEMVQFMEQLVTGATPAEELTVEER<br>YMAEFK | Nucleus,<br>cytosol,<br>plasma<br>membrane,<br>chloroplast | [79–81]   |
| 14-3-3 ν | AT3G02520 | 2                          | 12                  | MSSSREENVYLAK<br>TVDTDELTVERNLLSVAYK                                                                                                      | Chloroplast,<br>Cytosol                                    | [43]      |

593  
594  
595  
596  
597  
598  
599  
600  
601  
602  
603  
604  
605  
606  
607  
608  
609  
610  
611  
612  
613  
614  
615  
616  
617  
618  
619  
620  
621  
622  
623  
624  
625  
626  
627  
628  
629  
630  
631  
632  
633  
634  
635  
636  
637  
638  
639  
640  
641  
642  
643  
644  
645  
646

## References

1. Horling, F.; Lamkemeyer, P.; König, J.; Finkemeier, I.; Kandlbinder, A.; Baier, M.; Dietz, K.-J. Divergent light-, ascorbate-, and oxidative stress-dependent regulation of expression of the peroxiredoxin gene family in Arabidopsis. *Plant Physiol.* **2003**, *131*, 317–325, doi:10.1104/pp.010017.
2. Dietz, K.-J. Plant peroxiredoxins. *Annu. Rev. Plant Biol.* **2003**, *54*, 93–107, doi:10.1146/annurev.arplant.54.031902.134934.
3. Dietz, K.-J.; Jacob, S.; Oelze, M.-L.; Laxa, M.; Tognetti, V.; Miranda, S.M.N. de; Baier, M.; Finkemeier, I. The function of peroxiredoxins in plant organelle redox metabolism. *J. Exp. Bot.* **2006**, *57*, 1697–1709, doi:10.1093/jxb/erj160.
4. Brigelius-Flohé, R.; Flohé, L. Basic principles and emerging concepts in the redox control of transcription factors. *Antioxid. Redox Signal.* **2011**, *15*, 2335–2381, doi:10.1089/ars.2010.3534.
5. Baier, M.; Dietz, K.J. The plant 2-Cys peroxiredoxin BAS1 is a nuclear-encoded chloroplast protein: its expressional regulation, phylogenetic origin, and implications for its specific physiological function in plants. *Plant J.* **1997**, *12*, 179–190, doi:10.1046/j.1365-313x.1997.12010179.x.
6. Collin, V.; Issakidis-Bourguet, E.; Marchand, C.; Hirasawa, M.; Lancelin, J.-M.; Knaff, D.B.; Miginiac-Maslow, M. The Arabidopsis plastidial thioredoxins: new functions and new insights into specificity. *J. Biol. Chem.* **2003**, *278*, 23747–23752, doi:10.1074/jbc.M302077200.
7. Muthuramalingam, M.; Dietz, K.-J.; Ströher, E. Thiol - Disulfide Redox Proteomics in Plant Research. In *Plant Stress Tolerance: Methods and Protocols*; Sunkar, R., Ed.; Humana Press: Totowa, NJ, 2010; pp 219–238, ISBN 978-1-60761-702-0.
8. Vaseghi, M.-J.; Chibani, K.; Telman, W.; Liebthal, M.F.; Gerken, M.; Schnitzer, H.; Mueller, S.M.; Dietz, K.-J. The chloroplast 2-cysteine peroxiredoxin functions as thioredoxin oxidase in redox regulation of chloroplast metabolism. *Elife* **2018**, *7*, doi:10.7554/eLife.38194.
9. Lamkemeyer, P.; Laxa, M.; Collin, V.; Li, W.; Finkemeier, I.; Schöttler, M.A.; Holtkamp, V.; Tognetti, V.B.; Issakidis-Bourguet, E.; Kandlbinder, A.; et al. Peroxiredoxin Q of Arabidopsis thaliana is attached to the thylakoids and functions in context of photosynthesis. *Plant J.* **2006**, *45*, 968–981, doi:10.1111/j.1365-313X.2006.02665.x.
10. Romero-Puertas, M.C.; Laxa, M.; Mattè, A.; Zaninotto, F.; Finkemeier, I.; Jones, A.M.E.; Perazzolli, M.; Vandelle, E.; Dietz, K.-J.; Delledonne, M. S-nitrosylation of peroxiredoxin II E promotes peroxynitrite-mediated tyrosine nitration. *Plant Cell* **2007**, *19*, 4120–4130, doi:10.1105/tpc.107.055061.
11. Rouhier, N.; Gelhaye, E.; Sautiere, P.E.; Brun, A.; Laurent, P.; Tagu, D.; Gerard, J.; Faÿ, E. de; Meyer, Y.; Jacquot, J.P. Isolation and characterization of a new peroxiredoxin from poplar sieve tubes that uses either glutaredoxin or thioredoxin as a proton donor. *Plant Physiol.* **2001**, *127*, 1299–1309.
12. Stork, T.; Michel, K.-P.; Pistorius, E.K.; Dietz, K.-J. Bioinformatic analysis of the genomes of the cyanobacteria Synechocystis sp. PCC 6803 and Synechococcus elongatus PCC 7942 for the presence of peroxiredoxins and their transcript regulation under stress. *J. Exp. Bot.* **2005**, *56*, 3193–3206, doi:10.1093/jxb/eri316.
13. Declercq, J.P.; Evrard, C.; Clippe, A.; Stricht, D.V.; Bernard, A.; Knoops, B. Crystal structure of human peroxiredoxin 5, a novel type of mammalian peroxiredoxin at 1.5 Å resolution. *J. Mol. Biol.* **2001**, *311*, 751–759, doi:10.1006/jmbi.2001.4853.
14. Gama, F.; Bréhélin, C.; Gelhaye, E.; Meyer, Y.; Jacquot, J.-P.; Rey, P.; Rouhier, N. Functional analysis and expression characteristics of chloroplastic Prx IIE. *Physiol Plant* **2008**, *133*, 599–610, doi:10.1111/j.1399-3054.2008.01097.x.
15. Horling, F.; König, J.; Dietz, K.-J. Type II peroxiredoxin C, a member of the peroxiredoxin family of Arabidopsis thaliana: its expression and activity in comparison with other peroxiredoxins. *Plant Physiology and Biochemistry* **2002**, *40*, 491–499, doi:10.1016/S0981-9428(02)01396-7.
16. Couturier, J.; Ströher, E.; Albetel, A.-N.; Roret, T.; Muthuramalingam, M.; Tarrago, L.; Seidel, T.; Tsan, P.; Jacquot, J.-P.; Johnson, M.K.; et al. Arabidopsis chloroplastic glutaredoxin C5 as a model to explore molecular determinants for iron-sulfur cluster binding into glutaredoxins. *J. Biol. Chem.* **2011**, *286*, 27515–27527, doi:10.1074/jbc.M111.228726.
17. Ströher, E.; Dietz, K.-J. The dynamic thiol-disulphide redox proteome of the Arabidopsis thaliana chloroplast as revealed by differential electrophoretic mobility. *Physiol Plant* **2008**, *133*, 566–583, doi:10.1111/j.1399-3054.2008.01103.x.

- 647 18. König, J.; Baier, M.; Horling, F.; Kahmann, U.; Harris, G.; Schürmann, P.; Dietz, K.-J. The plant-specific  
648 function of 2-Cys peroxiredoxin-mediated detoxification of peroxides in the redox-hierarchy of photosynthetic  
649 electron flux. *Proc. Natl. Acad. Sci. U. S. A.* **2002**, *99*, 5738–5743, doi:10.1073/pnas.072644999.
- 650 19. Finkemeier, I.; Goodman, M.; Lamkemeyer, P.; Kandlbinder, A.; Sweetlove, L.J.; Dietz, K.-J. The  
651 mitochondrial type II peroxiredoxin F is essential for redox homeostasis and root growth of *Arabidopsis thaliana*  
652 under stress. *J. Biol. Chem.* **2005**, *280*, 12168–12180, doi:10.1074/jbc.M413189200.
- 653 20. Méchin, V.; Damerval, C.; Zivy, M. Total protein extraction with TCA-acetone. *Methods Mol. Biol.* **2007**, *355*,  
654 1–8, doi:10.1385/1-59745-227-0:1.
- 655 21. Seidel, T.; Gollmack, D.; Dietz, K.-J. Mapping of C-termini of V-ATPase subunits by in vivo-FRET  
656 measurements. *FEBS Letters* **2005**, *579*, 4374–4382, doi:10.1016/j.febslet.2005.06.077.
- 657 22. Seidel, T.; Kluge, C.; Hanitzsch, M.; Ross, J.; Sauer, M.; Dietz, K.-J.; Gollmack, D. Colocalization and FRET-  
658 analysis of subunits c and a of the vacuolar H<sup>+</sup>-ATPase in living plant cells. *Journal of biotechnology* **2004**, *112*,  
659 165–175, doi:10.1016/j.jbiotec.2004.04.027.
- 660 23. Muthuramalingam, M.; Matros, A.; Scheibe, R.; Mock, H.-P.; Dietz, K.-J. The hydrogen peroxide-sensitive  
661 proteome of the chloroplast in vitro and in vivo. *Frontiers in plant science* **2013**, *4*, 54, doi:10.3389/fpls.2013.00054.
- 662 24. Wessel, D.; Flügge, U.I. A method for the quantitative recovery of protein in dilute solution in the presence  
663 of detergents and lipids. *Anal. Biochem.* **1984**, *138*, 141–143, doi:10.1016/0003-2697(84)90782-6.
- 664 25. Jozefowicz, A.M.; Hartmann, A.; Matros, A.; Schum, A.; Mock, H.-P. Nitrogen Deficiency Induced  
665 Alterations in the Root Proteome of a Pair of Potato (*Solanum tuberosum* L.) Varieties Contrasting for their  
666 Response to Low N. *Proteomics* **2017**, *17*, doi:10.1002/pmic.201700231.
- 667 26. Arend, D.; Lange, M.; Chen, J.; Colmsee, C.; Flemming, S.; Hecht, D.; Scholz, U. e!DAL--a framework to  
668 store, share and publish research data. *BMC Bioinformatics* **2014**, *15*, 214, doi:10.1186/1471-2105-15-214.
- 669 27. Waterhouse, A.; Bertoni, M.; Bienert, S.; Studer, G.; Tauriello, G.; Gumienny, R.; Heer, F.T.; Beer, T.A.P. de;  
670 Rempfer, C.; Bordoli, L.; et al. SWISS-MODEL: homology modelling of protein structures and complexes. *Nucleic  
671 Acids Res.* **2018**, *46*, W296-W303, doi:10.1093/nar/gky427.
- 672 28. Schrödinger, L.L.C. *The PyMOL Molecular Graphics System, Version 2.4.0*, 2015.
- 673 29. Dietz, K.-J. Peroxiredoxins in plants and cyanobacteria. *Antioxid. Redox Signal.* **2011**, *15*, 1129–1159,  
674 doi:10.1089/ars.2010.3657.
- 675 30. Melchers, J.; Dirdjaja, N.; Ruppert, T.; Krauth-Siegel, R.L. Glutathionylation of trypanosomal thiol redox  
676 proteins. *J. Biol. Chem.* **2007**, *282*, 8678–8694, doi:10.1074/jbc.M608140200.
- 677 31. Park, J.W.; Piszczek, G.; Rhee, S.G.; Chock, P.B. Glutathionylation of peroxiredoxin I induces decamer to  
678 dimers dissociation with concomitant loss of chaperone activity. *Biochemistry* **2011**, *50*, 3204–3210,  
679 doi:10.1021/bi101373h.
- 680 32. Zaffagnini, M.; Bedhomme, M.; Marchand, C.H.; Morisse, S.; Trost, P.; Lemaire, S.D. Redox regulation in  
681 photosynthetic organisms: focus on glutathionylation. *Antioxid. Redox Signal.* **2012**, *16*, 567–586,  
682 doi:10.1089/ars.2011.4255.
- 683 33. Couturier, J.; Jacquot, J.-P.; Rouhier, N. Toward a refined classification of class I dithiol glutaredoxins from  
684 poplar: biochemical basis for the definition of two subclasses. *Frontiers in plant science* **2013**, *4*, 518,  
685 doi:10.3389/fpls.2013.00518.
- 686 34. Park, J.W.; Mieyal, J.J.; Rhee, S.G.; Chock, P.B. Deglutathionylation of 2-Cys peroxiredoxin is specifically  
687 catalyzed by sulfiredoxin. *J. Biol. Chem.* **2009**, *284*, 23364–23374, doi:10.1074/jbc.M109.021394.
- 688 35. Giustarini, D.; Rossi, R.; Milzani, A.; Colombo, R.; Dalle-Donne, I. S-glutathionylation: from redox  
689 regulation of protein functions to human diseases. *J. Cell. Mol. Med.* **2004**, *8*, 201–212, doi:10.1111/j.1582-  
690 4934.2004.tb00275.x.
- 691 36. Popov, D. Protein S-glutathionylation: from current basics to targeted modifications. *Archives of Physiology  
692 and Biochemistry* **2014**, *120*, 123–130, doi:10.3109/13813455.2014.944544.
- 693 37. Gasteiger, E.; Hoogland, C.; Gattiker, A.; Duvaud, S.'e.; Wilkins, M.R.; Appel, R.D.; Bairoch, A. Protein  
694 Identification and Analysis Tools on the ExpASY Server. In *The Proteomics Protocols Handbook*; Walker, J.M., Ed.;  
695 Humana Press: Totowa, NJ, 2005; pp 571–607, ISBN 978-1-59259-890-8.
- 696 38. Ferl, R.J.; Manak, M.S.; Reyes, M.F. The 14-3-3s. *Genome Biol.* **2002**, *3*, REVIEWS3010, doi:10.1186/gb-2002-  
697 3-7-reviews3010.
- 698 39. Zhou, H.; Lin, H.; Chen, S.; Becker, K.; Yang, Y.; Zhao, J.; Kudla, J.; Schumaker, K.S.; Guo, Y. Inhibition of  
699 the *Arabidopsis* salt overly sensitive pathway by 14-3-3 proteins. *Plant Cell* **2014**, *26*, 1166–1182,  
700 doi:10.1105/tpc.113.117069.

- 701 40. Vercruyssen, L.; Tognetti, V.B.; Gonzalez, N.; van Dingenen, J.; Milde, L. de; Bielach, A.; Rycke, R. de; van  
702 Breusegem, F.; Inzé, D. GROWTH REGULATING FACTOR5 stimulates Arabidopsis chloroplast division,  
703 photosynthesis, and leaf longevity. *Plant Physiol.* **2015**, *167*, 817–832, doi:10.1104/pp.114.256180.
- 704 41. Chevalier, D.; Morris, E.R.; Walker, J.C. 14-3-3 and FHA domains mediate phosphoprotein interactions.  
705 *Annu. Rev. Plant Biol.* **2009**, *60*, 67–91, doi:10.1146/annurev.arplant.59.032607.092844.
- 706 42. Dougherty, M.K.; Morrison, D.K. Unlocking the code of 14-3-3. *J. Cell Sci.* **2004**, *117*, 1875–1884,  
707 doi:10.1242/jcs.01171.
- 708 43. Sehnke, P.C.; Henry, R.; Cline, K.; Ferl, R.J. Interaction of a plant 14-3-3 protein with the signal peptide of a  
709 thylakoid-targeted chloroplast precursor protein and the presence of 14-3-3 isoforms in the chloroplast stroma.  
710 *Plant Physiol.* **2000**, *122*, 235–242, doi:10.1104/pp.122.1.235.
- 711 44. Cao, A.; Jain, A.; Baldwin, J.C.; Raghothama, K.G. Phosphate differentially regulates 14-3-3 family members  
712 and GRF9 plays a role in Pi-starvation induced responses. *Planta* **2007**, *226*, 1219–1230, doi:10.1007/s00425-007-  
713 0569-0.
- 714 45. Aryal, U.K.; Krochko, J.E.; Ross, A.R.S. Identification of phosphoproteins in Arabidopsis thaliana leaves  
715 using polyethylene glycol fractionation, immobilized metal-ion affinity chromatography, two-dimensional gel  
716 electrophoresis and mass spectrometry. *J. Proteome Res.* **2012**, *11*, 425–437, doi:10.1021/pr200917t.
- 717 46. Trujillo, M.; Clippe, A.; Manta, B.; Ferrer-Sueta, G.; Smeets, A.; Declercq, J.-P.; Knoops, B.; Radi, R. Pre-  
718 steady state kinetic characterization of human peroxiredoxin 5: taking advantage of Trp84 fluorescence increase  
719 upon oxidation. *Archives of Biochemistry and Biophysics* **2007**, *467*, 95–106, doi:10.1016/j.abb.2007.08.008.
- 720 47. König, J.; Galliardt, H.; Jütte, P.; Schäper, S.; Dittmann, L.; Dietz, K.-J. The conformational bases for the two  
721 functionalities of 2-cysteine peroxiredoxins as peroxidase and chaperone. *J. Exp. Bot.* **2013**, *64*, 3483–3497.
- 722 48. Sobotta, M.C.; Liou, W.; Stöcker, S.; Talwar, D.; Oehler, M.; Ruppert, T.; Scharf, A.N.D.; Dick, T.P.  
723 Peroxiredoxin-2 and STAT3 form a redox relay for H<sub>2</sub>O<sub>2</sub> signaling. *Nat. Chem. Biol.* **2015**, *11*, 64–70,  
724 doi:10.1038/nchembio.1695.
- 725 49. Liebthal, M.; Maynard, D.; Dietz, K.-J. Peroxiredoxins and Redox Signaling in Plants. *Antioxid. Redox Signal.*  
726 **2018**, *28*, 609–624.
- 727 50. Barranco-Medina, S.; Krell, T.; Bernier-Villamor, L.; Sevilla, F.; Lázaro, J.-J.; Dietz, K.-J. Hexameric  
728 oligomerization of mitochondrial peroxiredoxin PrxIIIF and formation of an ultrahigh affinity complex with its  
729 electron donor thioredoxin Trx-o. *J. Exp. Bot.* **2008**, *59*, 3259–3269.
- 730 51. Sparla, F.; Fermani, S.; Falini, G.; Zaffagnini, M.; Ripamonti, A.; Sabatino, P.; Pupillo, P.; Trost, P. Coenzyme  
731 site-directed mutants of photosynthetic A4-GAPDH show selectively reduced NADPH-dependent catalysis,  
732 similar to regulatory AB-GAPDH inhibited by oxidized thioredoxin. *J. Mol. Biol.* **2004**, *340*, 1025–1037,  
733 doi:10.1016/j.jmb.2004.06.005.
- 734 52. Bedhomme, M.; Zaffagnini, M.; Marchand, C.H.; Gao, X.-H.; Moslonka-Lefebvre, M.; Michelet, L.;  
735 Decottignies, P.; Lemaire, S.D. Regulation by glutathionylation of isocitrate lyase from *Chlamydomonas*  
736 *reinhardtii*. *J. Biol. Chem.* **2009**, *284*, 36282–36291, doi:10.1074/jbc.M109.064428.
- 737 53. Rouhier, N.; Lemaire, S.D.; Jacquot, J.-P. The role of glutathione in photosynthetic organisms: emerging  
738 functions for glutaredoxins and glutathionylation. *Annu. Rev. Plant Biol.* **2008**, *59*, 143–166,  
739 doi:10.1146/annurev.arplant.59.032607.092811.
- 740 54. Michelet, L.; Zaffagnini, M.; Marchand, C.; Collin, V.; Decottignies, P.; Tsan, P.; Lancelin, J.-M.; Trost, P.;  
741 Miginiac-Maslow, M.; Noctor, G.; et al. Glutathionylation of chloroplast thioredoxin f is a redox signaling  
742 mechanism in plants. *Proc. Natl. Acad. Sci. U. S. A.* **2005**, *102*, 16478–16483, doi:10.1073/pnas.0507498102.
- 743 55. Park, S.-W.; Li, W.; Viehhauser, A.; He, B.; Kim, S.; Nilsson, A.K.; Andersson, M.X.; Kittle, J.D.; Ambavaram,  
744 M.M.R.; Luan, S.; et al. Cyclophilin 20-3 relays a 12-oxo-phytyldienoic acid signal during stress responsive  
745 regulation of cellular redox homeostasis. *Proc. Natl. Acad. Sci. U. S. A.* **2013**, *110*, 9559–9564,  
746 doi:10.1073/pnas.1218872110.
- 747 56. Hartmann, T.N.; Fricker, M.D.; Rennenberg, H.; Meyer, A.J. Cell-specific measurement of cytosolic  
748 glutathione in poplar leaves. *Plant Cell Environ.* **2003**, *26*, 965–975, doi:10.1046/j.1365-3040.2003.01031.x.
- 749 57. Meyer, A.J.; Brach, T.; Marty, L.; Kreye, S.; Rouhier, N.; Jacquot, J.-P.; Hell, R. Redox-sensitive GFP in  
750 Arabidopsis thaliana is a quantitative biosensor for the redox potential of the cellular glutathione redox buffer.  
751 *Plant J.* **2007**, *52*, 973–986, doi:10.1111/j.1365-313X.2007.03280.x.
- 752 58. König, K.; Vaseghi, M.J.; Dreyer, A.; Dietz, K.-J. The significance of glutathione and ascorbate in modulating  
753 the retrograde high light response in Arabidopsis thaliana leaves. *Physiol Plant* **2018**, *162*, 262–273,  
754 doi:10.1111/ppl.12644.



- 755 59. Kumar, V.; Vogelsang, L.; Seidel, T.; Schmidt, R.; Weber, M.; Reichelt, M.; Meyer, A.; Clemens, S.; Sharma,  
756 S.S.; Dietz, K.-J. Interference between arsenic-induced toxicity and hypoxia. *Plant Cell Environ.* **2019**, *42*, 574–590,  
757 doi:10.1111/pce.13441.
- 758 60. Chae, H.Z.; Oubrahim, H.; Park, J.W.; Rhee, S.G.; Chock, P.B. Protein glutathionylation in the regulation of  
759 peroxiredoxins: a family of thiol-specific peroxidases that function as antioxidants, molecular chaperones, and  
760 signal modulators. *Antioxid. Redox Signal.* **2012**, *16*, 506–523, doi:10.1089/ars.2011.4260.
- 761 61. Buchanan, B.B.; Balmer, Y. Redox regulation: a broadening horizon. *Annu. Rev. Plant Biol.* **2005**, *56*, 187–  
762 220, doi:10.1146/annurev.arplant.56.032604.144246.
- 763 62. Dreyer, A.; Schackmann, A.; Kriznik, A.; Chibani, K.; Wesemann, C.; Vogelsang, L.; Beyer, A.; Dietz, K.-J.  
764 Thiol Redox Regulation of Plant  $\beta$ -Carbonic Anhydrase. *Biomolecules* **2020**, *10*, doi:10.3390/biom10081125.
- 765 63. Jones, D.H.; Ley, S.; Aitken, A. Isoforms of 14-3-3 protein can form homo- and heterodimers in vivo and in  
766 vitro: implications for function as adapter proteins. *FEBS Letters* **1995**, *368*, 55–58, doi:10.1016/0014-  
767 5793(95)00598-4.
- 768 64. Schultz, T.F.; Medina, J.; Hill, A.; Quatrano, R.S. 14-3-3 proteins are part of an abscisic acid-VIVIPAROUS1  
769 (VP1) response complex in the Em promoter and interact with VP1 and EmBP1. *Plant Cell* **1998**, *10*, 837–847,  
770 doi:10.1105/tpc.10.5.837.
- 771 65. Chung, H. The 14-3-3 proteins: cellular regulators of plant metabolism. *Trends in Plant Science* **1999**, *4*, 367–  
772 371, doi:10.1016/S1360-1385(99)01462-4.
- 773 66. Liang, X.; Da Paula, A.C.; Bozóky, Z.; Zhang, H.; Bertrand, C.A.; Peters, K.W.; Forman-Kay, J.D.; Frizzell,  
774 R.A. Phosphorylation-dependent 14-3-3 protein interactions regulate CFTR biogenesis. *Mol. Biol. Cell* **2012**, *23*,  
775 996–1009, doi:10.1091/mbc.E11-08-0662.
- 776 67. van Heusden, G.P.H. 14-3-3 proteins: regulators of numerous eukaryotic proteins. *IUBMB Life* **2005**, *57*,  
777 623–629.
- 778 68. Qu, D.; Rashidian, J.; Mount, M.P.; Aleyasin, H.; Parsanejad, M.; Lira, A.; Haque, E.; Zhang, Y.; Callaghan,  
779 S.; Daigle, M.; et al. Role of Cdk5-mediated phosphorylation of Prx2 in MPTP toxicity and Parkinson's disease.  
780 *Neuron* **2007**, *55*, 37–52, doi:10.1016/j.neuron.2007.05.033.
- 781 69. Pennington, K.L.; Chan, T.Y.; Torres, M.P.; Andersen, J.L. The dynamic and stress-adaptive signaling hub  
782 of 14-3-3: emerging mechanisms of regulation and context-dependent protein-protein interactions. *Oncogene*  
783 **2018**, *37*, 5587–5604, doi:10.1038/s41388-018-0348-3.
- 784 70. Ichijo, H.; Nishida, E.; Irie, K.; Dijke, P. ten; Saitoh, M.; Moriguchi, T.; Takagi, M.; Matsumoto, K.; Miyazono,  
785 K.; Gotoh, Y. Induction of apoptosis by ASK1, a mammalian MAPKKK that activates SAPK/JNK and p38  
786 signaling pathways. *Science* **1997**, *275*, 90–94, doi:10.1126/science.275.5296.90.
- 787 71. Bae, M.S.; Cho, E.J.; Choi, E.-Y.; Park, O.K. Analysis of the Arabidopsis nuclear proteome and its response  
788 to cold stress. *Plant J.* **2003**, *36*, 652–663, doi:10.1046/j.1365-313x.2003.01907.x.
- 789 72. Ito, J.; Bathth, T.S.; Petzold, C.J.; Redding-Johanson, A.M.; Mukhopadhyay, A.; Verboom, R.; Meyer, E.H.;  
790 Millar, A.H.; Heazlewood, J.L. Analysis of the Arabidopsis cytosolic proteome highlights subcellular  
791 partitioning of central plant metabolism. *J. Proteome Res.* **2011**, *10*, 1571–1582, doi:10.1021/pr1009433.
- 792 73. Helm, S.; Dobritzsch, D.; Rödiger, A.; Agne, B.; Baginsky, S. Protein identification and quantification by  
793 data-independent acquisition and multi-parallel collision-induced dissociation mass spectrometry (MS(E)) in the  
794 chloroplast stroma proteome. *J. Proteomics* **2014**, *98*, 79–89, doi:10.1016/j.jprot.2013.12.007.
- 795 74. Heard, W.; Sklenář, J.; Tomé, D.F.A.; Robatzek, S.; Jones, A.M.E. Identification of Regulatory and Cargo  
796 Proteins of Endosomal and Secretory Pathways in Arabidopsis thaliana by Proteomic Dissection. *Mol. Cell.*  
797 *Proteomics* **2015**, *14*, 1796–1813, doi:10.1074/mcp.M115.050286.
- 798 75. Yoshida, K.; Ohnishi, M.; Fukao, Y.; Okazaki, Y.; Fujiwara, M.; Song, C.; Nakanishi, Y.; Saito, K.; Shimmen,  
799 T.; Suzaki, T.; et al. Studies on vacuolar membrane microdomains isolated from Arabidopsis suspension-  
800 cultured cells: local distribution of vacuolar membrane proteins. *Plant Cell Physiol.* **2013**, *54*, 1571–1584,  
801 doi:10.1093/pcp/pct107.
- 802 76. Fakh, Z.; Ahmed, M.B.; Letanneur, C.; Germain, H. An unbiased nuclear proteomics approach reveals  
803 novel nuclear protein components that participates in MAMP-triggered immunity. *Plant Signal. Behav.* **2016**, *11*,  
804 e1183087, doi:10.1080/15592324.2016.1183087.
- 805 77. Mitra, S.K.; Walters, B.T.; Clouse, S.D.; Goshe, M.B. An efficient organic solvent based extraction method  
806 for the proteomic analysis of Arabidopsis plasma membranes. *J. Proteome Res.* **2009**, *8*, 2752–2767,  
807 doi:10.1021/pr801044y.

- 808 78. Iglesias, J.; Trigueros, M.; Rojas-Triana, M.; Fernández, M.; Albar, J.P.; Bustos, R.; Paz-Ares, J.; Rubio, V.  
809 Proteomics identifies ubiquitin-proteasome targets and new roles for chromatin-remodeling in the Arabidopsis  
810 response to phosphate starvation. *J. Proteomics* **2013**, *94*, 1–22, doi:10.1016/j.jprot.2013.08.015.
- 811 79. Rienties, I.M.; Vink, J.; Borst, J.W.; Russinova, E.; Vries, S.C. de. The Arabidopsis SERK1 protein interacts  
812 with the AAA-ATPase AtCDC48, the 14-3-3 protein GF14lambda and the PP2C phosphatase KAPP. *Planta* **2005**,  
813 *221*, 394–405, doi:10.1007/s00425-004-1447-7.
- 814 80. Yasuda, S.; Sato, T.; Maekawa, S.; Aoyama, S.; Fukao, Y.; Yamaguchi, J. Phosphorylation of Arabidopsis  
815 ubiquitin ligase ATL31 is critical for plant carbon/nitrogen nutrient balance response and controls the stability  
816 of 14-3-3 proteins. *J. Biol. Chem.* **2014**, *289*, 15179–15193, doi:10.1074/jbc.M113.533133.
- 817 81. Ferro, M.; Brugière, S.; Salvi, D.; Seigneurin-Berny, D.; Court, M.; Moyet, L.; Ramus, C.; Miras, S.; Mellal,  
818 M.; Le Gall, S.; et al. AT\_CHLORO, a comprehensive chloroplast proteome database with subplastidial  
819 localization and curated information on envelope proteins. *Mol. Cell. Proteomics* **2010**, *9*, 1063–1084,  
820 doi:10.1074/mcp.M900325-MCP200.
